# Supplementary material for: Generation and Bioenergetic Profiles of Cybrids with East Asian mtDNA Haplogroups
Source: Oxid Med Cell Longev. 2017 Sep 28;2017:1062314. doi: 10.1155/2017/1062314 (PMC5637837; doi:10.1155/2017/1062314)
Supplement: Supplementary file 2 [file 1062314.f2.xlsx]

## Sheet: Table S2
Table S2. Analysis of mtDNA copy number in 146 SNPs
Nucleotide change	Gene	AA change	Number of subjects		mtDNA copy nunbers
			rCRS base	Mutation	rCRS base	Mutation	P
T131C	D-loop	no	20	1	1.00 ± 0.030	1.05 ± 0.040	-
G143A	D-loop	no	20	1	1.00 ± 0.029	1.06 ± 0.078	-
T146C	D-loop	no	18	3	1.03 ± 0.031	0.81 ± 0.039	0.1
C150T	D-loop	no	17	4	0.94 ± 0.025	1.26 ± 0.088	0.23
T152C	D-loop	no	18	3	1.00 ± 0.032	1.03 ± 0.039	0.55
A188G	D-loop	no	20	1	0.98 ± 0.029	1.27 ± 0.084	-
A189G	D-loop	no	20	1	1.00 ± 0.030	1.05 ± 0.040	-
T199C	D-loop	no	19	2	0.94 ± 0.023	1.53 ± 0.066	-
A200G	D-loop	no	20	1	1.00 ± 0.030	0.96 ± 0.079	-
T204C	D-loop	no	20	1	0.97 ± 0.026	1.54 ± 0.087	-
G207A	D-loop	no	20	1	1.00 ± 0.029	1.00 ± 0.024	-
A210G	D-loop	no	20	1	1.01 ± 0.029	0.81 ± 0.048	-
A235G	D-loop	no	19	2	1.01 ± 0.031	1.04 ± 0.054	-
A249del	D-loop	no	16	5	1.08 ± 0.030	0.73 ± 0.028	< 0.01**
A257G	D-loop	no	20	1	1.01 ± 0.030	0.91 ± 0.032	-
C298T	D-loop	no	20	1	1.00 ± 0.029	0.99 ± 0.095	-
T310C	D-loop	no	19	2	0.97 ± 0.030	1.26 ± 0.050	-
315C+	D-loop	no	20	1	1.01 ± 0.029	0.75 ± 0.017	-
316C+	D-loop	no	19	2	1.04 ± 0.029	0.68 ± 0.042	-
C481T	D-loop	no	20	1	1.00 ± 0.030	1.05 ± 0.040	-
T489C	D-loop	no	12	9	0.90 ± 0.028	1.13 ± 0.047	0.05*
G499A	D-loop	no	20	1	1.00 ± 0.029	1.00 ± 0.024	-
A523del	D-loop	no	19	2	1.04 ± 0.029	0.69 ± 0.044	-
C524del	D-loop	no	19	2	1.04 ± 0.029	0.69 ± 0.044	-
A644G	tRNA Phe	no	20	1	1.02 ± 0.029	0.71 ± 0.049	-
A663G	12S rRNA	no	19	2	1.01 ± 0.031	1.04 ± 0.054	-
G709A	12S rRNA	no	15	6	0.96 ± 0.033	1.10 ± 0.050	0.14
C752T	12S rRNA	no	20	1	1.00 ± 0.029	1.03 ± 0.057	-
A827G	12S rRNA	no	20	1	1.00 ± 0.029	1.00 ± 0.024	-
T1005C	12S rRNA	no	19	2	1.03 ± 0.030	0.75 ± 0.038	-
T1107C	12S rRNA	no	20	1	1.00 ± 0.029	1.03 ± 0.057	-
T1420G	12S rRNA	no	20	1	1.01 ± 0.029	0.81 ± 0.048	-
A1438G	12S rRNA	no	1	20	1.00 ± 0.029	1.03 ± 0.057	-
C1508T	12S rRNA	no	20	1	1.01 ± 0.029	0.81 ± 0.048	-
G1598A	12S rRNA	no	20	1	1.00 ± 0.030	1.05 ± 0.040	-
A1736G	12S rRNA	no	19	2	1.01 ± 0.031	1.04 ± 0.054	-
T1824C	16S rRNA	no	19	2	1.03 ± 0.030	0.75 ± 0.038	-
C2280A	16S rRNA	no	20	1	1.02 ± 0.029	0.71 ± 0.049	-
A2281G	16S rRNA	no	20	1	1.02 ± 0.029	0.71 ± 0.049	-
C2772T	16S rRNA	no	20	1	1.00 ± 0.029	1.01 ± 0.024	-
C2835T	16S rRNA	no	20	1	1.01 ± 0.030	0.91 ± 0.032	-
G3010A	16S rRNA	no	18	3	1.02 ± 0.031	0.88 ± 0.065	0.48
N3107del	16S rRNA	no	20	1	1.02 ± 0.028	0.65 ± 0.069	-
G4048A	ND1	D > N	19	2	0.94 ± 0.023	1.53 ± 0.066	-
T4386C	tRNA Gln	no	20	1	1.01 ± 0.029	0.80 ± 0.088	-
A4824G	ND2	T > A	19	2	1.01 ± 0.031	1.04 ± 0.054	-
A4833G	ND2	T > A	19	2	0.98 ± 0.030	1.17 ± 0.064	-
A4935G	ND2	T > A	20	1	0.99 ± 0.029	1.00 ± 0.024	-
A5301G	ND2	I > V	20	1	1.00 ± 0.029	1.03 ± 0.057	-
G5460A	ND2	A > T	20	1	0.96 ± 0.026	1.54 ± 0.087	-
C5601T	tRNA Ala	no	20	1	0.98 ± 0.029	1.27 ± 0.084	-
G5640A	ND2	A > T	20	1	0.98 ± 0.027	1.52 ± 0.12	-
G5821A	tRNA Cys	no	20	1	1.01 ± 0.029	0.75 ± 0.017	-
G6580A	COI	G > E	20	1	0.97 ± 0.026	1.54 ± 0.087	-
G7853A	COII	V > I	18	3	0.95 ± 0.024	1.31 ± 0.11	0.27
8281-8289del	Non-coding 7	CCCCCTCTA	17	4	0.99 ± 0.034	1.03 ± 0.038	0.47
C8414T	ATPase8	L > F	19	2	1.00 ± 0.030	1.00 ± 0.086	-
T8576C	ATPase6	L > P	20	1	1.00 ± 0.030	0.96 ± 0.079	-
G8584A	ATPase6	A > T	17	4	1.03 ± 0.034	0.90 ± 0.031	0.35
C8684T	ATPase6	T > I	20	1	1.01 ± 0.030	0.91 ± 0.032	-
A8701G	ATPase6	T > A	12	9	0.87 ± 0.030	1.12 ± 0.039	0.05*
C8794T	ATPase6	H > Y	19	2	1.01 ± 0.031	1.04 ± 0.054	-
T8843C	ATPase6	I > T	20	1	1.02 ± 0.029	0.71 ± 0.049	-
G9053A	ATPase6	S > N	19	2	1.03 ± 0.029	0.71 ± 0.056	-
G10320A	COIII	V > I	20	1	1.00 ± 0.030	1.05 ± 0.040	-
A10398G	ND3	T > A	10	11	0.88 ± 0.032	1.10 ± 0.040	0.05*
C10400T	ND3	T > A	12	9	0.87 ± 0.030	1.12 ± 0.039	0.05*
T10410C	tRNA Arg	no	20	1	1.00 ± 0.029	1.01 ± 0.16	-
T10609C	ND4L	M > T	19	2	1.03 ± 0.029	0.71 ± 0.056	-
G11696A	ND4	V > I	20	1	1.00 ± 0.029	1.01 ± 0.16	-
A12026G	ND4	I >V	20	1	1.00 ± 0.029	1.03 ± 0.057	-
T12083C	ND4	S > A	20	1	1.01 ± 0.029	0.81 ± 0.078	-
T12131C	ND4	S > P	20	1	1.00 ± 0.030	0.96 ± 0.079	-
A12190G	tRNA His	no	20	1	0.99 ± 0.029	1.00 ± 0.024	-
C12216T	tRNA Ser	no	20	1	1.01 ± 0.029	0.81 ± 0.048	-
T12338C	ND5	M > T	19	2	1.03 ± 0.030	0.75 ± 0.038	-
A12358G	ND5	T > A	20	1	1.01 ± 0.029	0.80 ± 0.088	-
A12361G	ND5	T > A	20	1	1.00 ± 0.030	1.05 ± 0.040	-
G12406A	ND5	V > I	19	2	1.03 ± 0.029	0.71 ± 0.056	-
T12811C	ND5	Y > H	19	2	0.94 ± 0.023	1.53 ± 0.066	-
G13708A	ND5	A > T	18	3	1.04 ± 0.031	0.77 ± 0.034	0.04*
G13759A	ND5	A > T	19	2	1.03 ± 0.029	0.71 ± 0.056	-
G13928C	ND5	S > T	17	4	1.07 ± 0.030	0.73 ± 0.033	0.01*
T14178C	ND6	I > V	20	1	1.01 ± 0.029	0.88 ± 0.10	-
T14318C	ND6	N > S	20	1	1.01 ± 0.029	0.75 ± 0.017	-
A14693G	tRNA Glu	no	20	1	1.01 ± 0.029	0.88 ± 0.10	-
A14769G	Cytb	N > S	20	1	1.02 ± 0.029	0.71 ± 0.049	-
A14978G	Cytb	I > V	20	1	1.01 ± 0.029	0.75 ± 0.017	-
A15662G	Cytb	I > V	20	1	1.00 ± 0.030	1.05 ± 0.040	-
A15746G	Cytb	I > V	20	1	1.00 ± 0.029	1.06 ± 0.078	-
A15851G	Cytb	I > V	20	1	1.00 ± 0.030	1.05 ± 0.040	-
G15927A	tRNA Thr	no	20	1	1.00 ± 0.030	1.05 ± 0.040	-
G15928A	tRNA Thr	no	20	1	1.01 ± 0.029	0.75 ± 0.017	-
G15930A	tRNA Thr	no	20	1	1.01 ± 0.029	0.81 ± 0.078	-
T16093C	D-loop	no	20	1	0.98 ± 0.027	1.52 ± 0.12	-
C16111T	D-loop	no	19	2	1.00 ± 0.030	1.05 ± 0.040	-
T16124C	D-loop	no	20	1	1.00 ± 0.030	0.96 ± 0.079	-
T16126C	D-loop	no	20	1	1.01 ± 0.029	0.88 ± 0.10	-
G16129A	D-loop	no	15	6	1.02 ± 0.032	0.94 ± 0.058	0.51
T16136C	D-loop	no	20	1	1.00 ± 0.029	1.00 ± 0.024	-
T16140C	D-loop	no	19	2	1.01 ± 0.031	0.96 ± .048	-
A16162G	D-loop	no	20	1	1.02 ± 0.028	0.65 ± 0.069	-
A16164G	D-loop	no	20	1	1.00 ± 0.029	1.03 ± 0.057	-
T16172C	D-loop	no	17	4	1.03 ± 0.031	0.85 ± 0.058	0.4
A16182C	D-loop	no	17	2	0.99 ± 0.033	1.03 ± 0.039	-
A16183C	D-loop	no	16	3	0.99 ± 0.035	1.03 ± 0.032	0.88
C16184T	D-loop	no	20	1	1.01 ± 0.030	0.91 ± 0.032	-
C16188T	D-loop	no	20	1	1.00 ± 0.029	1.06 ± 0.078	-
T16189C	D-loop	no	15	6	1.00 ± 0.038	1.00 ± 0.027	0.46
C16192T	D-loop	no	20	1	0.98 ± 0.027	1.52 ± 0.12	-
T16209C	D-loop	no	20	1	1.01 ± 0.030	0.91 ± 0.032	-
G16213A	D-loop	no	20	1	0.99 ± 0.030	1.11 ± 0.065	-
T16217C	D-loop	no	20	1	1.00 ± 0.029	1.00 ± 0.024	-
C16223T	D-loop	no	9	12	0.87 ± 0.032	1.09 ± 0.039	0.08
A16227G	D-loop	no	20	1	0.98 ± 0.029	1.27 ± 0.084	-
T16231C	D-loop	no	20	1	1.01 ± 0.029	0.88 ± 0.10	-
T16243C	D-loop	no	20	1	1.00 ± 0.030	1.05 ± 0.040	-
T16249C	D-loop	no	20	1	1.01 ± 0.029	0.88 ± 0.10	-
C16257A	D-loop	no	20	1	1.01 ± 0.029	0.80 ± 0.088	-
C16259T	D-loop	no	20	1	1.00 ± 0.029	1.03 ± 0.057	-
C16261T	D-loop	no	19	2	1.00 ± 0.030	1.01 ± 0.091	-
C16266A	D-loop	no	18	3	1.04 ± 0.030	0.76 ± 0.049	0.08
G16274A	D-loop	no	20	1	1.00 ± 0.029	1.06 ± 0.078	-
C16278T	D-loop	no	19	2	1.00 ± 0.031	1.09 ± 0.070	-
C16290T	D-loop	no	19	2	1.01 ± 0.031	1.04 ± 0.054	-
C16291T	D-loop	no	20	1	1.01 ± 0.029	0.81 ± 0.052	-
A16293C	D-loop	no	20	1	0.98 ± 0.029	1.27 ± 0.084	-
T16297C	D-loop	no	19	2	0.94 ± 0.023	1.53 ± 0.066	-
T16298C	D-loop	no	18	3	1.03 ± 0.032	0.83 ± 0.027	0.13
T16304C	D-loop	no	17	4	1.07 ± 0.030	0.73 ± 0.033	0.01*
A16309G	D-loop	no	20	1	0.98 ± 0.027	1.52 ± 0.12	-
T16311C	D-loop	no	20	1	1.01 ± 0.029	0.75 ± 0.017	-
G16319A	D-loop	no	16	5	1.01 ± 0.035	0.97 ± 0.039	0.87
C16327T	D-loop	no	18	3	0.97 ± 0.027	1.16 ± 0.11	0.69
T16352C	D-loop	no	20	1	1.02 ± 0.028	0.65 ± 0.069	-
C16360T	D-loop	no	20	1	0.99 ± 0.029	1.00 ± 0.024	-
T16362C	D-loop	no	15	6	0.97 ± 0.036	1.09 ± 0.045	0.19
A16399G	D-loop	no	20	1	1.01 ± 0.029	0.88 ± 0.10	-
A16463G	D-loop	no	20	1	1.00 ± 0.030	1.05 ± 0.040	-
G16470A	D-loop	no	20	1	1.01 ± 0.030	0.91 ± 0.032	-
G16471A	D-loop	no	20	1	1.01 ± 0.030	0.91 ± 0.032	-
G16473A	D-loop	no	20	1	1.01 ± 0.030	0.91 ± 0.032	-
A16476G	D-loop	no	20	1	1.01 ± 0.030	0.91 ± 0.032	-
T16519C	D-loop	no	11	10	1.12 ± 0.039	0.86 ± 0.030	0.2
G16526A	D-loop	no	20	1	1.00 ± 0.030	0.99 ± 0.095	-
C16527T	D-loop	no	20	1	1.02 ± 0.030	0.71 ± 0.049	-
rCRS: revised Cambridge Reference Sequence
AA: Amino Acid
*P < 0.05, **P < 0.01, data are shown as mean ± SEM.
