# Supplementary material for: Generation and Bioenergetic Profiles of Cybrids with East Asian mtDNA Haplogroups
Source: Oxid Med Cell Longev. 2017 Sep 28;2017:1062314. doi: 10.1155/2017/1062314 (PMC5637837; doi:10.1155/2017/1062314)
Supplement: Supplementary file 3 [file 1062314.f3.xlsx]

## Sheet: Table S3
Table S3. Analysis of mitochondria DNA transcription in 146 SNPs
Nucleotide change	Gene	AA change	Number of subjects		Mitochondria DNA transcription (L, H1, H2)
			rCRS base	Mutation	rCRS base	Mutation	P (L)	rCRS base	Mutation	P (H1)	rCRS base	Mutation	P (H2)
T131C	D-loop	no	20	1	1.46 ± 0.27	0.82 ± 0.053	-	1.12 ± 0.091	1.29 ± 0.099	-	1.08 ± 0.056	0.66 ± 0.0023	-
G143A	D-loop	no	20	1	1.46 ± 0.27	0.91 ± 0.16	-	1.08 ± 0.085	1.94 ± 0.18	-	1.04 ± 0.055	1.46 ± 0.25	-
T146C	D-loop	no	18	3	1.48 ± 0.30	1.12 ± 0.18	0.55	1.20 ± 0.095	0.70 ± 0.083	0.07	1.08 ± 0.061	0.94 ± 0.11	0.69
C150T	D-loop	no	17	4	1.38 ± 0.29	1.66 ± 0.60	0.93	1.04 ± 0.088	1.49 ± 0.23	0.24	0.98 ± 0.054	1.39 ± 0.12	0.07
T152C	D-loop	no	18	3	1.53 ± 0.30	0.84 ± 0.16	0.48	1.11 ± 0.098	1.21 ± 0.14	0.48	1.09 ± 0.062	0.87 ± 0.076	0.37
A188G	D-loop	no	20	1	1.13 ± 0.15	7.35 ± 1.71	-	1.08 ± 0.082	2.05 ± 0.52	-	1.04 ± 0.056	1.41 ± 0.17	-
A189G	D-loop	no	20	1	1.46 ± 0.27	0.82 ± 0.053	-	1.12 ± 0.091	1.29 ± 0.099	-	1.08 ± 0.056	0.66 ± 0.0023	-
T199C	D-loop	no	19	2	1.52 ± 0.28	0.60 ± 0.058	-	1.02 ± 0.079	2.07 ± 0.057	-	1.02 ± 0.056	1.46 ± 0.093	-
A200G	D-loop	no	20	1	1.46 ± 0.27	0.73 ± 0.0087	-	1.11 ± 0.090	1.44 ± 0.19	-	1.06 ± 0.058	0.94 ± 0.057	-
T204C	D-loop	no	20	1	1.47 ± 0.27	0.68 ± 0.061	-	1.08 ± 0.085	1.98 ± 0.053	-	1.03 ± 0.055	1.57 ± 0.010	-
G207A	D-loop	no	20	1	1.48 ± 0.27	0.50 ± 0.037	-	1.11 ± 0.090	1.39 ± 0.12	-	1.06 ± 0.058	1.02 ± 0.0039	-
A210G	D-loop	no	20	1	1.45 ± 0.27	1.07 ± 0.17	-	1.12 ± 0.091	1.12 ± 0.17	-	1.05 ± 0.057	1.20 ± 0.18	-
A235G	D-loop	no	19	2	1.47 ± 0.28	1.01 ± 0.18	-	1.13 ± 0.094	1.12 ± 0.20	-	1.09 ± 0.058	0.79 ± 0.092	-
A249del	D-loop	no	16	5	1.60 ± 0.33	0.88 ± 0.14	0.51	1.20 ± 0.10	0.89 ± 0.12	0.41	1.11 ± 0.067	0.91 ± 0.071	0.25
A257G	D-loop	no	20	1	1.49 ± 0.27	0.28 ± 0.032	-	1.15 ± 0.089	0.64 ± 0.014	-	1.04 ± 0.056	1.45 ± 0.068	-
C298T	D-loop	no	20	1	1.43 ± 0.27	1.45 ± 0.13	-	1.16 ± 0.088	0.50 ± 0.065	-	1.05 ± 0.057	1.15 ± 0.17	-
T310C	D-loop	no	19	2	1.15 ± 0.16	4.06 ± 2.02	-	1.10 ± 0.086	1.41 ± 0.43	-	1.07 ± 0.056	0.99 ± 0.25	-
315C+	D-loop	no	20	1	1.42 ± 0.27	1.66 ± 0.048	-	1.16 ± 0.088	0.47 ± 0.040	-	1.05 ± 0.057	1.21 ± 0.10	-
316C+	D-loop	no	19	2	1.52 ± 0.28	0.51 ± 0.038	-	1.13 ± 0.093	1.11 ± 0.23	-	1.09 ± 0.058	0.79 ± 0.11	-
C481T	D-loop	no	20	1	1.46 ± 0.27	0.82 ± 0.053	-	1.12 ± 0.091	1.29 ± 0.099	-	1.08 ± 0.056	0.66 ± 0.0023	-
T489C	D-loop	no	12	9	0.82 ± 0.053	2.24 ± 0.55	0.16	1.02 ± 0.066	1.26 ± 0.18	0.94	0.90 ± 0.068	1.28 ± 0.062	0.01*
G499A	D-loop	no	20	1	1.48 ± 0.2687	0.50 ± 0.037	-	1.11 ± 0.090	1.39 ± 0.12	-	1.06 ± 0.058	1.02 ± 0.0039	-
A523del	D-loop	no	19	2	1.46 ± 0.28	1.12 ± 0.32	-	1.14 ± 0.091	0.98 ± 0.29	-	1.07 ± 0.058	0.92 ± 0.18	-
C524del	D-loop	no	19	2	1.46 ± 0.28	1.12 ± 0.32	-	1.14 ± 0.091	0.98 ± 0.29	-	1.07 ± 0.058	0.92 ± 0.18	-
A644G	tRNA Phe	no	20	1	1.48 ± 0.27	0.46 ± 0.043	-	1.14 ± 0.090	0.73 ± 0.12	-	1.06 ± 0.057	0.96 ± 0.13	-
A663G	12S rRNA	no	19	2	1.47 ± 0.28	1.01 ± 0.18	-	1.13 ± 0.094	1.12 ± 0.20	-	1.09 ± 0.058	0.79 ± 0.092	-
G709A	12S rRNA	no	15	6	1.23 ± 0.20	1.92 ± 0.76	0.64	0.95 ± 0.081	1.56 ± 0.17	0.03*	1.03 ± 0.063	1.12 ± 0.11	0.48
C752T	12S rRNA	no	20	1	1.28 ± 0.25	4.36 ± 0.30	-	1.13 ± 0.091	1.08 ± 0.12	-	1.07 ± 0.057	0.90 ± 0.083	-
A827G	12S rRNA	no	20	1	1.48 ± 0.2687	0.50 ± 0.037	-	1.11 ± 0.090	1.39 ± 0.12	-	1.06 ± 0.058	1.02 ± 0.0039	-
T1005C	12S rRNA	no	19	2	1.51 ± 0.28	0.64 ± 0.11	-	1.16 ± 0.093	0.79 ± 0.087	-	1.07 ± 0.060	0.95 ± 0.061	-
T1107C	12S rRNA	no	20	1	1.28 ± 0.25	4.36 ± 0.30	-	1.13 ± 0.091	1.08 ± 0.12	-	1.07 ± 0.057	0.90 ± 0.083	-
T1420G	12S rRNA	no	20	1	1.45 ± 0.27	1.07 ± 0.17	-	1.12 ± 0.091	1.12 ± 0.17	-	1.05 ± 0.057	1.20 ± 0.18	-
A1438G	12S rRNA	no	1	20	1.28 ± 0.25	4.36 ± 0.30	-	1.13 ± 0.091	1.08 ± 0.12	-	1.07 ± 0.057	0.90 ± 0.083	-
C1508T	12S rRNA	no	20	1	1.45 ± 0.27	1.07 ± 0.17	-	1.12 ± 0.091	1.12 ± 0.17	-	1.05 ± 0.057	1.20 ± 0.18	-
G1598A	12S rRNA	no	20	1	1.46 ± 0.27	0.82 ± 0.053	-	1.12 ± 0.091	1.29 ± 0.099	-	1.08 ± 0.056	0.66 ± 0.0023	-
A1736G	12S rRNA	no	19	2	1.47 ± 0.28	1.01 ± 0.18	-	1.13 ± 0.094	1.12 ± 0.20	-	1.09 ± 0.058	0.79 ± 0.092	-
T1824C	16S rRNA	no	19	2	1.51 ± 0.28	0.64 ± 0.11	-	1.16 ± 0.093	0.79 ± 0.087	-	1.07 ± 0.060	0.95 ± 0.061	-
C2280A	16S rRNA	no	20	1	1.48 ± 0.27	0.46 ± 0.043	-	1.14 ± 0.090	0.73 ± 0.12	-	1.06 ± 0.057	0.96 ± 0.13	-
A2281G	16S rRNA	no	20	1	1.48 ± 0.27	0.46 ± 0.043	-	1.14 ± 0.090	0.73 ± 0.12	-	1.06 ± 0.057	0.96 ± 0.13	-
C2772T	16S rRNA	no	20	1	1.48 ± 0.27	0.50 ± 0.037	-	1.11 ± 0.090	1.39 ± 0.12	-	1.06 ± 0.058	1.02 ± 0.0039	-
C2835T	16S rRNA	no	20	1	1.49 ± 0.27	0.28 ± 0.032	-	1.15 ± 0.089	0.64 ± 0.014	-	1.04 ± 0.056	1.45 ± 0.068	-
G3010A	16S rRNA	no	18	3	1.40 ± 0.29	1.62 ± 0.46	0.62	1.22 ± 0.092	0.58 ± 0.060	0.03*	1.06 ± 0.063	1.03 ± 0.072	0.92
N3107del	16S rRNA	no	20	1	1.47 ± 0.27	0.57 ± 0.018	-	1.11 ± 0.090	1.49 ± 0.026	-	1.08 ± 0.056	0.62 ± 0.011	-
G4048A	ND1	D > N	19	2	1.52 ± 0.28	0.60 ± 0.058	-	1.02 ± 0.079	2.07 ± 0.057	-	1.02 ± 0.056	1.46 ± 0.093	-
T4386C	tRNA Gln	no	20	1	1.45 ± 0.27	1.08 ± 0.072	-	1.15 ± 0.090	0.71 ± 0.044	-	1.02 ± 0.052	1.74 ± 0.0088	-
A4824G	ND2	T > A	19	2	1.47 ± 0.28	1.01 ± 0.18	-	1.13 ± 0.094	1.12 ± 0.20	-	1.09 ± 0.058	0.79 ± 0.092	-
A4833G	ND2	T > A	19	2	1.15 ± 0.16	4.13 ± 1.99	-	1.03 ± 0.079	2.00 ± 0.23	-	1.02 ± 0.056	1.43 ± 0.12	-
A4935G	ND2	T > A	20	1	1.46 ± 0.27	0.77 ± 0.0073	-	1.14 ± 0.090	0.76 ± 0.018	-	1.08 ± 0.055	0.56 ± 0.029	-
A5301G	ND2	I > V	20	1	1.28 ± 0.25	4.36 ± 0.30	-	1.13 ± 0.091	1.08 ± 0.12	-	1.07 ± 0.057	0.90 ± 0.083	-
G5460A	ND2	A > T	20	1	1.47 ± 0.27	0.68 ± 0.061	-	1.08 ± 0.085	1.98 ± 0.053	-	1.03 ± 0.0552	1.57 ± 0.010	-
C5601T	tRNA Ala	no	20	1	1.13 ± 0.15	7.35 ± 1.71	-	1.08 ± 0.082	2.05 ± 0.52	-	1.08 ± 0.056	0.66 ± 0.0023	-
G5640A	ND2	A > T	20	1	1.48 ± 0.27	0.51 ± 0.023	-	1.07 ± 0.082	2.17 ± 0.012	-	1.04 ± 0.057	1.34 ± 0.16	-
G5821A	tRNA Cys	no	20	1	1.42 ± 0.27	1.66 ± 0.048	-	1.16 ± 0.088	0.47 ± 0.040	-	1.05 ± 0.057	1.21 ± 0.10	-
G6580A	COI	G > E	20	1	1.48 ± 0.27	0.51 ± 0.023	-	1.07 ± 0.082	2.17 ± 0.012	-	1.04 ± 0.057	1.34 ± 0.16	-
G7853A	COII	V > I	18	3	1.51 ± 0.30	0.95 ± 0.23	0.62	1.06 ± 0.081	1.54 ± 0.34	0.42	1.01 ± 0.058	1.37 ± 0.083	0.07
8281-8289del	Non-coding 7	CCCCCTCTA	17	4	1.58 ± 0.31	0.79 ± 0.085	0.37	1.12 ± 0.10	1.15 ± 0.10	0.65	1.11 ± 0.061	0.86 ± 0.10	0.28
C8414T	ATPase8	L > F	19	2	1.35 ± 0.28	2.20 ± 0.44	-	1.19 ± 0.089	0.50 ± 0.027	-	1.06 ± 0.0624	1.07 ± 0.094	-
T8576C	ATPase6	L > P	20	1	1.46 ± 0.27	0.73 ± 0.0087	-	1.11 ± 0.090	1.44 ± 0.19	-	1.06 ± 0.058	0.94 ± 0.057	-
G8584A	ATPase6	A > T	17	4	1.54 ± 0.31	0.96 ± 0.19	0.86	1.18 ± 0.10	0.89 ± 0.13	0.28	1.04 ± 0.063	1.13 ± 0.12	0.47
C8684T	ATPase6	T > I	20	1	1.49 ± 0.27	0.28 ± 0.032	-	1.15 ± 0.089	0.64 ± 0.014	-	1.04 ± 0.056	1.45 ± 0.068	-
A8701G	ATPase6	T > A	12	9	0.82 ± 0.053	2.24 ± 0.55	0.16	1.02 ± 0.066	1.26 ± 0.18	0.94	0.90 ± 0.068	1.28 ± 0.062	0.01*
C8794T	ATPase6	H > Y	19	2	1.47 ± 0.28	1.01 ± 0.18	-	1.13 ± 0.094	1.12 ± 0.20	-	1.09 ± 0.058	0.79 ± 0.092	-
T8843C	ATPase6	I > T	20	1	1.48 ± 0.27	0.46 ± 0.043	-	1.14 ± 0.090	0.73 ± 0.12	-	1.06 ± 0.057	0.96 ± 0.13	-
G9053A	ATPase6	S > N	19	2	1.50 ± 0.28	0.73 ± 0.10	-	1.12 ± 0.094	1.19 ± 0.18	-	1.09 ± 0.057	0.72 ± 0.069	-
G10320A	COIII	V > I	20	1	1.46 ± 0.27	0.82 ± 0.053	-	1.12 ± 0.091	1.29 ± 0.099	-	1.08 ± 0.056	0.66 ± 0.0023	-
A10398G	ND3	T > A	10	11	0.80 ± 0.060	2.00 ± 0.46	0.14	0.98 ± 0.074	1.25 ± 0.15	0.67	0.90 ± 0.068	1.21 ± 0.065	0.02*
C10400T	ND3	T > A	12	9	0.82 ± 0.053	2.24 ± 0.55	0.16	1.02 ± 0.066	1.26 ± 0.18	0.94	0.90 ± 0.068	1.28 ± 0.062	0.01*
T10410C	tRNA Arg	no	20	1	1.35 ± 0.27	2.95 ± 0.065	-	1.16 ± 0.088	0.50 ± 0.014	-	1.06 ± 0.058	0.99 ± 0.11	-
T10609C	ND4L	M > T	19	2	1.50 ± 0.28	0.73 ± 0.10	-	1.12 ± 0.094	1.19 ± 0.18	-	1.09 ± 0.057	0.72 ± 0.069	-
G11696A	ND4	V > I	20	1	1.35 ± 0.27	2.95 ± 0.065	-	1.16 ± 0.088	0.50 ± 0.014	-	1.06 ± 0.058	0.99 ± 0.11	-
A12026G	ND4	I >V	20	1	1.28 ± 0.25	4.36 ± 0.30	-	1.13 ± 0.091	1.08 ± 0.12	-	1.07 ± 0.057	0.90 ± 0.083	-
T12083C	ND4	S > A	20	1	1.45 ± 0.27	0.89 ± 0.093	-	1.14 ± 0.090	0.89 ± 0.089	-	1.07 ± 0.057	0.81 ± 0.10	-
T12131C	ND4	S > P	20	1	1.46 ± 0.27	0.73 ± 0.0087	-	1.11 ± 0.090	1.44 ± 0.19	-	1.06 ± 0.058	0.94 ± 0.057	-
A12190G	tRNA His	no	20	1	1.46 ± 0.27	0.77 ± 0.0073	-	1.14 ± 0.090	0.76 ± 0.018	-	1.08 ± 0.055	0.56 ± 0.029	-
C12216T	tRNA Ser	no	20	1	1.45 ± 0.27	1.07 ± 0.17	-	1.12 ± 0.091	1.12 ± 0.17	-	1.05 ± 0.057	1.20 ± 0.18	-
T12338C	ND5	M > T	19	2	1.51 ± 0.28	0.64 ± 0.11	-	1.16 ± 0.093	0.79 ± 0.087	-	1.07 ± 0.060	0.95 ± 0.061	-
A12358G	ND5	T > A	20	1	1.45 ± 0.27	1.08 ± 0.072	-	1.15 ± 0.090	0.71 ± 0.044	-	1.02 ± 0.052	1.74 ± 0.0088	-
A12361G	ND5	T > A	20	1	1.46 ± 0.27	0.82 ± 0.053	-	1.12 ± 0.091	1.29 ± 0.099	-	1.08 ± 0.056	0.66 ± 0.0023	-
G12406A	ND5	V > I	19	2	1.50 ± 0.28	0.73 ± 0.10	-	1.12 ± 0.094	1.19 ± 0.18	-	1.09 ± 0.057	0.72 ± 0.069	-
T12811C	ND5	Y > H	19	2	1.52 ± 0.28	0.60 ± 0.058	-	1.02 ± 0.079	2.07 ± 0.057	-	1.02 ± 0.056	1.46 ± 0.093	-
G13708A	ND5	A > T	18	3	1.55 ± 0.30	0.72 ± 0.091	0.37	1.18 ± 0.098	0.82 ± 0.063	0.55	1.08 ± 0.063	0.90 ± 0.055	0.37
G13759A	ND5	A > T	19	2	1.50 ± 0.28	0.73 ± 0.10	-	1.12 ± 0.094	1.19 ± 0.18	-	1.09 ± 0.057	0.72 ± 0.069	-
G13928C	ND5	S > T	17	4	1.60 ± 0.31	0.69 ± 0.071	0.18	1.16 ± 0.10	0.99 ± 0.12	1	1.11 ± 0.063	0.83 ± 0.061	0.11
T14178C	ND6	I > V	20	1	1.46 ± 0.27	0.88 ± 0.15	-	1.14 ± 0.090	0.77 ± 0.046	-	1.08 ± 0.056	0.65 ± 0.054	-
T14318C	ND6	N > S	20	1	1.42 ± 0.27	1.66 ± 0.048	-	1.16 ± 0.088	0.47 ± 0.040	-	1.05 ± 0.057	1.21 ± 0.10	-
A14693G	tRNA Glu	no	20	1	1.46 ± 0.27	0.88 ± 0.15	-	1.14 ± 0.090	0.77 ± 0.046	-	1.08 ± 0.056	0.65 ± 0.054	-
A14769G	Cytb	N > S	20	1	1.48 ± 0.27	0.46 ± 0.043	-	1.14 ± 0.090	0.73 ± 0.12	-	1.06 ± 0.057	0.96 ± 0.13	-
A14978G	Cytb	I > V	20	1	1.42 ± 0.27	1.66 ± 0.048	-	1.16 ± 0.088	0.47 ± 0.040	-	1.05 ± 0.057	1.21 ± 0.10	-
A15662G	Cytb	I > V	20	1	1.46 ± 0.27	0.82 ± 0.053	-	1.12 ± 0.091	1.29 ± 0.099	-	1.08 ± 0.056	0.66 ± 0.0023	-
A15746G	Cytb	I > V	20	1	1.46 ± 0.27	0.91 ± 0.16	-	1.08 ± 0.085	1.94 ± 0.18	-	1.04 ± 0.055	1.46 ± 0.25	-
A15851G	Cytb	I > V	20	1	1.46 ± 0.27	0.82 ± 0.053	-	1.12 ± 0.091	1.29 ± 0.099	-	1.08 ± 0.056	0.66 ± 0.0023	-
G15927A	tRNA Thr	no	20	1	1.46 ± 0.27	0.82 ± 0.053	-	1.12 ± 0.091	1.29 ± 0.099	-	1.08 ± 0.056	0.66 ± 0.0023	-
G15928A	tRNA Thr	no	20	1	1.42 ± 0.27	1.66 ± 0.048	-	1.16 ± 0.088	0.47 ± 0.040	-	1.05 ± 0.057	1.21 ± 0.10	-
G15930A	tRNA Thr	no	20	1	1.45 ± 0.27	0.89 ± 0.093	-	1.14 ± 0.090	0.89 ± 0.089	-	1.07 ± 0.057	0.81 ± 0.10	-
T16093C	D-loop	no	20	1	1.48 ± 0.27	0.51 ± 0.023	-	1.07 ± 0.082	2.17 ± 0.012	-	1.04 ± 0.057	1.34 ± 0.16	-
C16111T	D-loop	no	19	2	1.46 ± 0.27	0.82 ± 0.053	-	1.12 ± 0.091	1.29 ± 0.099	-	1.08 ± 0.056	0.66 ± 0.0023	-
T16124C	D-loop	no	20	1	1.46 ± 0.27	0.73 ± 0.0087	-	1.11 ± 0.090	1.44 ± 0.19	-	1.06 ± 0.058	0.94 ± 0.057	-
T16126C	D-loop	no	20	1	1.46 ± 0.27	0.88 ± 0.15	-	1.14 ± 0.090	0.77 ± 0.046	-	1.08 ± 0.056	0.65 ± 0.054	-
G16129A	D-loop	no	15	6	1.69 ± 0.35	0.77 ± 0.11	0.31	1.13 ± 0.10	1.12 ± 0.17	0.94	1.06 ± 0.056	1.05 ± 0.15	1
T16136C	D-loop	no	20	1	1.48 ± 0.27	0.50 ± 0.037	-	1.11 ± 0.090	1.39 ± 0.12	-	1.06 ± 0.058	1.02 ± 0.0039	-
T16140C	D-loop	no	19	2	1.48 ± 0.28	0.94 ± 0.10	-	1.11 ± 0.095	1.22 ± 0.089	-	1.07 ± 0.058	0.93 ± 0.17	-
A16162G	D-loop	no	20	1	1.47 ± 0.27	0.57 ± 0.018	-	1.11 ± 0.090	1.22 ± 0.026	-	1.08 ± 0.056	0.62 ± 0.011	-
A16164G	D-loop	no	20	1	1.28 ± 0.25	4.36 ± 0.30	-	1.13 ± 0.091	1.08 ± 0.12	-	1.07 ± 0.057	0.90 ± 0.083	-
T16172C	D-loop	no	17	4	1.25 ± 0.28	2.19 ± 0.59	0.28	1.16 ± 0.10	0.99 ± 0.14	0.86	1.11 ± 0.063	0.83 ± 0.060	0.11
A16182C	D-loop	no	17	2	1.35 ± 0.29	1.75 ± 0.57	-	1.14 ± 0.11	1.07 ± 0.086	-	1.11 ± 0.061	0.83 ± 0.10	-
A16183C	D-loop	no	16	3	1.41 ± 0.31	1.50 ± 0.48	0.48	1.12 ± 0.11	1.14 ± 0.082	0.37	1.12 ± 0.064	0.87 ± 0.083	0.84
C16184T	D-loop	no	20	1	1.49 ± 0.27	0.28 ± 0.032	-	1.15 ± 0.089	0.64 ± 0.014	-	1.04 ± 0.056	1.45 ± 0.068	-
C16188T	D-loop	no	20	1	1.46 ± 0.27	0.91 ± 0.16	-	1.08 ± 0.085	1.94 ± 0.18	-	1.04 ± 0.055	1.46 ± 0.25	-
T16189C	D-loop	no	15	6	1.44 ± 0.30	1.40 ± 0.50	0.39	1.15 ± 0.12	1.05 ± 0.088	0.94	1.10 ± 0.067	0.97 ± 0.095	0.48
C16192T	D-loop	no	20	1	1.48 ± 0.27	0.51 ± 0.023	-	1.07 ± 0.082	2.17 ± 0.012	-	1.04 ± 0.057	1.34 ± 0.16	-
T16209C	D-loop	no	20	1	1.49 ± 0.27	0.28 ± 0.032	-	1.15 ± 0.089	0.64 ± 0.014	-	1.04 ± 0.056	1.45 ± 0.068	-
G16213A	D-loop	no	20	1	1.44 ± 0.27	1.28 ± 0.22	-	1.14 ± 0.090	0.80 ± 0.016	-	1.08 ± 0.056	0.64 ± 0.046	-
T16217C	D-loop	no	20	1	1.48 ± 0.27	0.50 ± 0.037	-	1.11 ± 0.090	1.39 ± 0.12	-	1.06 ± 0.058	1.02 ± 0.0039	-
C16223T	D-loop	no	9	12	0.75 ± 0.051	1.94 ± 0.42	0.08	1.04 ± 0.073	1.19 ± 0.14	0.89	0.83 ± 0.054	1.23 ± 0.069	0.01*
A16227G	D-loop	no	20	1	1.13 ± 0.15	7.35 ± 1.71	-	1.08 ± 0.082	2.05 ± 0.52	-	1.08 ± 0.056	0.66 ± 0.0023	-
T16231C	D-loop	no	20	1	1.46 ± 0.27	0.88 ± 0.15	-	1.14 ± 0.090	0.77 ± 0.046	-	1.08 ± 0.056	0.65 ± 0.054	-
T16243C	D-loop	no	20	1	1.46 ± 0.27	0.82 ± 0.053	-	1.12 ± 0.091	1.29 ± 0.099	-	1.08 ± 0.056	0.66 ± 0.0023	-
T16249C	D-loop	no	20	1	1.46 ± 0.27	0.88 ± 0.15	-	1.14 ± 0.090	0.77 ± 0.046	-	1.08 ± 0.056	0.65 ± 0.054	-
C16257A	D-loop	no	20	1	1.45 ± 0.27	1.08 ± 0.072	-	1.15 ± 0.090	0.71 ± 0.044	-	1.02 ± 0.052	1.74 ± 0.0088	-
C16259T	D-loop	no	20	1	1.28 ± 0.25	4.36 ± 0.30	-	1.13 ± 0.091	1.08 ± 0.12	-	1.07 ± 0.057	0.90 ± 0.083	-
C16261T	D-loop	no	19	2	1.48 ± 0.28	0.93 ± 0.095	-	1.17 ± 0.093	0.74 ± 0.023	-	1.05 ± 0.052	1.15 ± 0.34	-
C16266A	D-loop	no	18	3	1.53 ± 0.30	0.84 ± 0.11	0.76	1.12 ± 0.099	1.14 ± 0.14	0.18	1.10 ± 0.059	0.82 ± 0.13	0.19
G16274A	D-loop	no	20	1	1.46 ± 0.27	0.91 ± 0.16	-	1.08 ± 0.085	1.94 ± 0.18	-	1.04 ± 0.055	1.46 ± 0.25	-
C16278T	D-loop	no	19	2	1.18 ± 0.15	3.81 ± 2.16	-	1.10 ± 0.085	1.35 ± 0.46	-	1.02 ± 0.057	1.43 ± 0.074	-
C16290T	D-loop	no	19	2	1.47 ± 0.28	1.01 ± 0.18	-	1.13 ± 0.094	1.12 ± 0.20	-	1.09 ± 0.058	0.79 ± 0.092	-
C16291T	D-loop	no	20	1	1.46 ± 0.27	0.83 ± 0.059	-	1.14 ± 0.090	0.85 ± 0.15	-	1.06 ± 0.058	0.94 ± 0.076	-
A16293C	D-loop	no	20	1	1.13 ± 0.15	7.35 ± 1.71	-	1.08 ± 0.082	2.05 ± 0.52	-	1.04 ± 0.056	1.41 ± 0.17	-
T16297C	D-loop	no	19	2	1.52 ± 0.28	0.60 ± 0.058	-	1.02 ± 0.079	2.07 ± 0.057	-	1.02 ± 0.056	1.46 ± 0.093	-
T16298C	D-loop	no	18	3	1.50 ± 0.30	1.01 ± 0.26	1	1.19 ± 0.095	0.76 ± 0.14	0.65	1.02 ± 0.061	1.29 ± 0.077	0.16
T16304C	D-loop	no	17	4	1.60 ± 0.31	0.69 ± 0.071	0.18	1.16 ± 0.10	0.99 ± 0.12	0.41	1.11 ± 0.063	0.83 ± 0.061	0.11
A16309G	D-loop	no	20	1	1.48 ± 0.27	0.51 ± 0.023	-	1.07 ± 0.082	2.17 ± 0.012	-	1.04 ± 0.057	1.34 ± 0.16	-
T16311C	D-loop	no	20	1	1.42 ± 0.27	1.66 ± 0.048	-	1.16 ± 0.088	0.47 ± 0.040	-	1.05 ± 0.057	1.21 ± 0.10	-
G16319A	D-loop	no	16	5	1.49 ± 0.33	1.23 ± 0.31	0.93	1.22 ± 0.10	0.83 ± 0.11	0.67	1.10 ± 0.064	0.93 ± 0.10	0.41
C16327T	D-loop	no	18	3	1.37 ± 0.29	1.77 ± 0.42	0.32	1.15 ± 0.088	0.98 ± 0.32	0.96	1.02 ± 0.060	1.26 ± 0.11	0.19
T16352C	D-loop	no	20	1	1.47 ± 0.27	0.57 ± 0.018	-	1.11 ± 0.090	1.49 ± 0.026	-	1.08 ± 0.056	0.62 ± 0.011	-
C16360T	D-loop	no	20	1	1.46 ± 0.27	0.77 ± 0.0073	-	1.14 ± 0.090	0.76 ± 0.018	-	1.08 ± 0.055	0.56 ± 0.029	-
T16362C	D-loop	no	15	6	0.82 ± 0.066	2.96 ± 0.74	0.02*	1.07 ± 0.091	1.25 ± 0.20	0.7	1.03 ± 0.070	1.14 ± 0.081	0.44
A16399G	D-loop	no	20	1	1.46 ± 0.27	0.88 ± 0.15	-	1.14 ± 0.090	0.77 ± 0.046	-	1.08 ± 0.056	0.65 ± 0.054	-
A16463G	D-loop	no	20	1	1.46 ± 0.27	0.82 ± 0.053	-	1.12 ± 0.091	1.29 ± 0.099	-	1.08 ± 0.056	0.66 ± 0.0023	-
G16470A	D-loop	no	20	1	1.49 ± 0.27	0.28 ± 0.032	-	1.15 ± 0.089	0.64 ± 0.014	-	1.04 ± 0.056	1.45 ± 0.068	-
G16471A	D-loop	no	20	1	1.49 ± 0.27	0.28 ± 0.032	-	1.15 ± 0.089	0.64 ± 0.014	-	1.04 ± 0.056	1.45 ± 0.068	-
G16473A	D-loop	no	20	1	1.49 ± 0.27	0.28 ± 0.032	-	1.15 ± 0.089	0.64 ± 0.014	-	1.04 ± 0.056	1.45 ± 0.068	-
A16476G	D-loop	no	20	1	1.49 ± 0.27	0.28 ± 0.032	-	1.15 ± 0.089	0.64 ± 0.014	-	1.04 ± 0.056	1.45 ± 0.068	-
T16519C	D-loop	no	11	10	1.96 ± 0.46	0.84 ± 0.078	0.21	1.26 ± 0.15	0.98 ± 0.076	0.57	1.24 ± 0.075	0.86 ± 0.056	0.02*
G16526A	D-loop	no	20	1	1.43 ± 0.27	1.45 ± 0.13	-	1.16 ± 0.088	0.50 ± 0.065	-	1.05 ± 0.057	1.15 ± 0.17	-
C16527T	D-loop	no	20	1	1.48 ± 0.27	0.46 ± 0.043	-	1.14 ± 0.090	0.73 ± 0.12	-	1.06 ± 0.057	0.96 ± 0.13	-
rCRS, revised Cambridge Reference Sequence
AA, Amino Acid
*P < 0.05, data are shown as mean ± SEM.
