# Supplementary material for: Generation and Bioenergetic Profiles of Cybrids with East Asian mtDNA Haplogroups
Source: Oxid Med Cell Longev. 2017 Sep 28;2017:1062314. doi: 10.1155/2017/1062314 (PMC5637837; doi:10.1155/2017/1062314)
Supplement: Supplementary file 4 [file 1062314.f4.xlsx]

## Sheet: Table S4
Table S4. Analysis of endogenous oxygen consumption in 146 SNPs
Nucleotide change	Gene	AA change	Number of subjects		Basal respiration			Uncoupled respiration
			rCRS Base	Mutation	rCRS Base	Mutation	P	rCRS Base	Mutation	P
T131C	D-loop	no	20	1	12.27 ± 0.48	15.03 ± 0.67	-	5.69 ± 0.33	5.46 ± 0.33	-
G143A	D-loop	no	20	1	12.22 ± 0.46	18.01 ± 2.12	-	5.54 ± 0.31	10.07 ± 0.41	-
T146C	D-loop	no	18	3	12.78 ± 0.52	10.37 ± 0.65	0.76	5.82 ± 0.36	4.92 ± 0.22	0.48
C150T	D-loop	no	17	4	12.12 ± 0.54	13.63 ± 0.67	0.37	5.44 ± 0.37	6.68 ± 0.42	0.07
T152C	D-loop	no	18	3	12.80 ± 0.51	9.98 ± 0.67	0.13	5.89 ± 0.35	4.38 ± 0.47	0.13
A188G	D-loop	no	20	1	11.86 ± 0.40	20.62 ± 1.31	-	5.29 ± 0.23	11.55 ± 2.16	-
A189G	D-loop	no	20	1	12.27 ± 0.48	15.03 ± 0.67	-	5.69 ± 0.33	5.46 ± 0.33	-
T199C	D-loop	no	19	2	12.24 ± 0.50	13.96 ± 0.56	-	5.65 ± 0.34	5.99 ± 0.48	-
A200G	D-loop	no	20	1	12.60 ± 0.48	9.49 ± 0.28	-	5.72 ± 0.33	5.02 ± 0.21	-
T204C	D-loop	no	20	1	12.30 ± 0.48	14.41 ± 1.14	-	5.64 ± 0.32	6.53 ± 0.83	-
G207A	D-loop	no	20	1	12.53 ± 0.47	8.36 ± 1.51	-	5.77 ± 0.31	2.82 ± 0.64	-
A210G	D-loop	no	20	1	12.41 ± 0.48	12.31 ± 1.49	-	5.73 ± 0.33	4.51 ± 0.52	-
A235G	D-loop	no	19	2	12.64 ± 0.5	10.44 ± 0.71	-	5.78 ± 0.34	4.83 ± 0.46	-
A249del	D-loop	no	16	5	13.17 ± 0.55	10.29 ± 0.63	0.22	6.03 ± 0.40	4.70 ± 0.32	0.51
A257G	D-loop	no	20	1	12.39 ± 0.48	12.69 ± 0.61	-	5.77 ± 0.32	3.82 ± 0.4	-
C298T	D-loop	no	20	1	12.23 ± 0.47	15.98 ± 0.28	-	5.61 ± 0.32	7.13 ± 0.65	-
T310C	D-loop	no	19	2	12.01 ± 0.41	15.61 ± 2.47	-	5.37 ± 0.24	8.18 ± 1.97	-
315C+	D-loop	no	20	1	12.51 ± 0.48	10.37 ± 1.22	-	5.71 ± 0.33	5.21 ± 0.19	-
316C+	D-loop	no	19	2	12.49 ± 0.51	11.70 ± 1.02	-	5.72 ± 0.34	5.32 ± 0.60	-
C481T	D-loop	no	20	1	12.27 ± 0.48	15.03 ± 0.67	-	5.69 ± 0.33	5.46 ± 0.33	-
T489C	D-loop	no	12	9	11.15 ± 0.48	14.12 ± 0.77	0.05*	4.84 ± 0.26	6.82 ± 0.58	0.05*
G499A	D-loop	no	20	1	12.53 ± 0.47	8.36 ± 1.51	-	5.77 ± 0.31	2.82 ± 0.64	-
A523del	D-loop	no	19	2	12.45 ± 0.51	11.99 ± 0.89	-	5.74 ± 0.35	5.19 ± 0.10	-
C524del	D-loop	no	19	2	12.45 ± 0.51	11.99 ± 0.89	-	5.74 ± 0.35	5.19 ± 0.10	-
A644G	tRNA Phe	no	20	1	12.55 ± 0.48	10.23 ± 1.36	-	5.69 ± 0.33	5.43 ± 1.13	-
A663G	12S rRNA	no	19	2	12.64 ± 0.50	10.44 ± 0.71	-	5.78 ± 0.34	4.83 ± 0.46	-
G709A	12S rRNA	no	15	6	11.27 ± 0.43	15.31 ± 0.92	0.04*	5.11 ± 0.26	7.14 ± 0.82	0.16
C752T	12S rRNA	no	1	20	12.48 ± 0.48	10.76 ± 0.21	-	5.62 ± 0.32	6.84 ± 0.66	-
A827G	12S rRNA	no	20	1	12.53 ± 0.47	8.36 ± 1.51	-	5.77 ± 0.31	2.82 ± 0.64	-
T1005C	12S rRNA	no	19	2	12.75 ± 0.49	9.60 ± 0.8	-	5.78 ± 0.34	4.87 ± 0.66	-
T1107C	12S rRNA	no	20	1	12.48 ± 0.48	10.76 ± 0.21	-	5.62 ± 0.32	6.84 ± 0.66	-
T1420G	12S rRNA	no	20	1	12.41 ± 0.48	12.31 ± 1.49	-	5.73 ± 0.33	4.51 ± 0.52	-
A1438G	12S rRNA	no	1	20	10.76 ± 0.21	12.48 ± 0.48	-	6.84 ± 0.66	5.62 ± 0.32	-
C1508T	12S rRNA	no	20	1	12.56 ± 0.50	11.12 ± 1.01	-	5.76 ± 0.34	5.03 ± 0.66	-
G1598A	12S rRNA	no	20	1	12.27 ± 0.48	15.03 ± 0.67	-	5.69 ± 0.33	5.46 ± 0.33	-
A1736G	12S rRNA	no	19	2	12.64 ± 0.50	10.44 ± 0.71	-	5.78 ± 0.34	4.83 ± 0.46	-
T1824C	16S rRNA	no	19	2	12.75 ± 0.49	9.60 ± 0.8	-	5.78 ± 0.34	4.87 ± 0.66	-
C2280A	16S rRNA	no	20	1	12.55 ± 0.48	10.23 ± 1.36	-	5.69 ± 0.33	5.43 ± 1.13	-
A2281G	16S rRNA	no	20	1	12.55 ± 0.48	10.23 ± 1.36	-	5.69 ± 0.33	5.43 ± 1.13	-
C2772T	16S rRNA	no	20	1	12.53 ± 0.47	8.36 ± 1.51	-	5.77 ± 0.31	2.82 ± 0.64	-
C2835T	16S rRNA	no	20	1	12.39 ± 0.48	12.69 ± 0.61	-	5.77 ± 0.32	3.82 ± 0.4	-
G3010A	16S rRNA	no	18	3	12.50 ± 0.50	11.84 ± 1.19	0.84	5.68 ± 0.35	5.65 ± 0.66	0.62
N3107del	16S rRNA	no	20	1	12.34 ± 0.48	13.66 ± 0.36	-	5.70 ± 0.33	5.17 ± 0.03	-
G4048A	ND1	D > N	19	2	12.24 ± 0.50	13.96 ± 0.56	-	5.65 ± 0.34	5.99 ± 0.48	-
T4386C	tRNA Gln	no	20	1	12.23 ± 0.47	15.85 ± 1.29	-	5.57 ± 0.32	7.92 ± 1.06	-
A4824G	ND2	T > A	19	2	12.64 ± 0.50	10.44 ± 0.71	-	5.78 ± 0.34	4.83 ± 0.46	-
A4833G	ND2	T > A	19	2	11.64 ± 0.38	19.75 ± 1.14	-	5.12 ± 0.21	11.06 ± 1.41	-
A4935G	ND2	T > A	20	1	12.57 ± 0.47	8.92 ± 0.4	-	5.78 ± 0.32	3.68 ± 0.13	-
A5301G	ND2	I > V	20	1	12.48 ± 0.48	10.76 ± 0.21	-	5.62 ± 0.32	6.84 ± 0.66	-
G5460A	ND2	A > T	20	1	12.30 ± 0.48	14.41 ± 1.14	-	5.64 ± 0.32	6.53 ± 0.83	-
C5601T	tRNA Ala	no	20	1	11.86 ± 0.40	20.62 ± 1.31	-	5.29 ± 0.23	11.55 ± 2.16	-
G5640A	ND2	A > T	20	1	12.35 ± 0.48	13.51 ± 0.28	-	5.69 ± 0.33	5.45 ± 0.40	-
G5821A	tRNA Cys	no	20	1	12.51 ± 0.48	10.37 ± 1.22	-	5.71 ± 0.33	5.21 ± 0.19	-
G6580A	COI	G > E	20	1	12.35 ± 0.48	13.51 ± 0.28	-	5.69 ± 0.33	5.45 ± 0.40	-
G7853A	COII	V > I	18	3	12.35 ± 0.53	12.67 ± 0.76	0.32	5.68 ± 0.37	5.68 ± 0.31	0.37
8281-8289del	Non-coding 7	CCCCCTCTA	17	4	12.61 ± 0.52	11.41 ± 0.96	0.47	5.98 ± 0.36	4.23 ± 0.34	0.07
C8414T	ATPase8	L > F	19	2	12.34 ± 0.48	13.32 ± 1.75	-	5.66 ± 0.33	5.83 ± 0.87	-
T8576C	ATPase6	L > P	20	1	12.60 ± 0.48	9.49 ± 0.28	-	5.72 ± 0.33	5.02 ± 0.21	-
G8584A	ATPase6	A > T	17	4	12.46 ± 0.70	12.54 ± 0.66	0.37	6.01 ± 0.47	4.78 ± 0.24	0.59
C8684T	ATPase6	T > I	20	1	12.39 ± 0.48	12.69 ± 0.61	-	5.77 ± 0.32	3.82 ± 0.40	-
A8701G	ATPase6	T > A	12	9	11.15 ± 0.48	14.12 ± 0.77	0.05*	4.84 ± 0.26	6.82 ± 0.58	0.05*
C8794T	ATPase6	H > Y	19	2	12.64 ± 0.50	10.44 ± 0.71	-	5.78 ± 0.34	4.83 ± 0.46	-
T8843C	ATPase6	I > T	20	1	12.55 ± 0.48	10.23 ± 1.36	-	5.69 ± 0.33	5.43 ± 1.13	-
G9053A	ATPase6	S > N	19	2	12.57 ± 0.49	10.79 ± 1.39	-	5.84 ± 0.33	4.15 ± 0.47	-
G10320A	COIII	V > I	20	1	12.27 ± 0.48	15.03 ± 0.67	-	5.69 ± 0.33	5.46 ± 0.33	-
A10398G	ND3	T > A	10	11	10.66 ± 0.51	14.31 ± 0.64	0.02*	4.81 ± 0.31	6.49 ± 0.50	0.07
C10400T	ND3	T > A	12	9	11.15 ± 0.48	14.12 ± 0.77	0.05*	4.84 ± 0.26	6.82 ± 0.58	0.05*
T10410C	tRNA Arg	no	20	1	12.52 ± 0.47	8.88 ± 0.13	-	5.74 ± 0.32	3.88 ± 0.19	-
T10609C	ND4L	M > T	19	2	12.57 ± 0.49	10.79 ± 1.39	-	5.84 ± 0.33	4.15 ± 0.47	-
G11696A	ND4	V > I	20	1	12.52 ± 0.47	8.88 ± 0.13	-	5.74 ± 0.32	3.88 ± 0.19	-
A12026G	ND4	I >V	20	1	12.48 ± 0.48	10.76 ± 0.21	-	5.62 ± 0.32	6.84 ± 0.66	-
T12083C	ND4	S > A	20	1	12.62 ± 0.46	7.93 ± 1.12	-	5.80 ± 0.32	3.13 ± 0.24	-
T12131C	ND4	S > P	20	1	12.60 ± 0.48	9.49 ± 0.28	-	5.72 ± 0.33	5.02 ± 0.21	-
A12190G	tRNA His	no	20	1	12.57 ± 0.47	8.92 ± 0.40	-	5.78 ± 0.32	3.68 ± 0.13	-
C12216T	tRNA Ser	no	20	1	12.41 ± 0.48	12.31 ± 1.49	-	5.73 ± 0.33	4.51 ± 0.52	-
T12338C	ND5	M > T	19	2	12.75 ± 0.49	9.60 ± 0.80	-	5.78 ± 0.34	4.87 ± 0.66	-
A12358G	ND5	T > A	20	1	12.23 ± 0.47	15.85 ± 1.29	-	5.57 ± 0.32	7.92 ± 1.06	-
A12361G	ND5	T > A	20	1	12.27 ± 0.48	15.03 ± 0.67	-	5.69 ± 0.33	5.46 ± 0.33	-
G12406A	ND5	V > I	19	2	12.57 ± 0.49	10.79 ± 1.39	-	5.84 ± 0.33	4.15 ± 0.47	-
T12811C	ND5	Y > H	19	2	12.24 ± 0.50	13.96 ± 0.56	-	5.65 ± 0.34	5.99 ± 0.48	-
G13708A	ND5	A > T	18	3	13.02 ± 0.49	9.10 ± 0.67	0.04*	5.92 ± 0.35	4.35 ± 0.53	0.32
G13759A	ND5	A > T	19	2	12.57 ± 0.49	10.79 ± 1.39	-	5.84 ± 0.33	4.15 ± 0.47	-
G13928C	ND5	S > T	17	4	12.98 ± 0.52	10.15 ± 0.76	0.13	5.97 ± 0.37	4.54 ± 0.42	0.33
T14178C	ND6	I > V	20	1	12.45 ± 0.48	11.50 ± 1.08	-	5.70 ± 0.33	5.31 ± 0.39	-
T14318C	ND6	N > S	20	1	12.51 ± 0.48	10.37 ± 1.22	-	5.71 ± 0.33	5.21 ± 0.19	-
A14693G	tRNA Glu	no	20	1	12.45 ± 0.48	11.5 ± 1.08	-	5.70 ± 0.33	5.31 ± 0.39	-
A14769G	Cytb	N > S	20	1	12.55 ± 0.48	10.23 ± 1.36	-	5.69 ± 0.33	5.43 ± 1.13	-
A14978G	Cytb	I > V	20	1	12.51 ± 0.48	10.37 ± 1.22	-	5.71 ± 0.33	5.21 ± 0.19	-
A15662G	Cytb	I > V	20	1	12.27 ± 0.48	15.03 ± 0.67	-	5.69 ± 0.33	5.46 ± 0.33	-
A15746G	Cytb	I > V	20	1	12.22 ± 0.46	18.01 ± 2.12	-	5.54 ± 0.31	10.07 ± 0.41	-
A15851G	Cytb	I > V	20	1	12.27 ± 0.48	15.03 ± 0.67	-	5.69 ± 0.33	5.46 ± 0.33	-
G15927A	tRNA Thr	no	20	1	12.27 ± 0.48	15.03 ± 0.67	-	5.69 ± 0.33	5.46 ± 0.33	-
G15928A	tRNA Thr	no	20	1	12.51 ± 0.48	10.37 ± 1.22	-	5.71 ± 0.33	5.21 ± 0.19	-
G15930A	tRNA Thr	no	20	1	12.62 ± 0.46	7.93 ± 1.12	-	5.80 ± 0.32	3.13 ± 0.24	-
T16093C	D-loop	no	20	1	12.35 ± 0.48	13.51 ± 0.28	-	5.69 ± 0.33	5.45 ± 0.40	-
C16111T	D-loop	no	19	2	12.27 ± 0.48	15.03 ± 0.67	-	5.69 ± 0.33	5.46 ± 0.33	-
T16124C	D-loop	no	20	1	12.60 ± 0.48	9.49 ± 0.28	-	5.72 ± 0.33	5.02 ± 0.21	-
T16126C	D-loop	no	20	1	12.45 ± 0.48	11.5 ± 1.08	-	5.70 ± 0.33	5.31 ± 0.39	-
G16129A	D-loop	no	15	6	12.34 ± 0.59	12.56 ± 0.67	0.82	5.94 ± 0.39	5.01 ± 0.44	0.39
T16136C	D-loop	no	20	1	12.53 ± 0.47	8.36 ± 1.51	-	5.77 ± 0.31	2.82 ± 0.64	-
T16140C	D-loop	no	19	2	12.27 ± 0.50	13.67 ± 0.95	-	5.75 ± 0.34	4.98 ± 0.35	-
A16162G	D-loop	no	20	1	12.34 ± 0.48	13.66 ± 0.36	-	5.70 ± 0.33	5.17 ± 0.03	-
A16164G	D-loop	no	20	1	12.48 ± 0.48	10.76 ± 0.21	-	5.62 ± 0.32	6.84 ± 0.66	-
T16172C	D-loop	no	17	4	12.81 ± 0.52	10.43 ± 0.76	0.13	5.85 ± 0.36	4.84 ± 0.49	0.37
A16182C	D-loop	no	17	2	12.89 ± 0.52	10.32 ± 0.71	-	5.90 ± 0.36	4.71 ± 0.46	-
A16183C	D-loop	no	16	3	12.72 ± 0.55	11.27 ± 0.75	0.84	5.92 ± 0.38	4.79 ± 0.39	0.23
C16184T	D-loop	no	20	1	12.39 ± 0.48	12.69 ± 0.61	-	5.77 ± 0.32	3.82 ± 0.40	-
C16188T	D-loop	no	20	1	12.22 ± 0.46	18.01 ± 2.12	-	5.54 ± 0.31	10.07 ± 0.41	-
T16189C	D-loop	no	15	6	12.72 ± 0.58	11.52 ± 0.63	0.39	6.06 ± 0.39	4.62 ± 0.36	0.1
C16192T	D-loop	no	20	1	12.35 ± 0.48	13.51 ± 0.28	-	5.69 ± 0.33	5.45 ± 0.40	-
T16209C	D-loop	no	20	1	12.39 ± 0.48	12.69 ± 0.61	-	5.77 ± 0.32	3.82 ± 0.40	-
G16213A	D-loop	no	20	1	12.44 ± 0.48	11.71 ± 1.41	-	5.73 ± 0.32	4.58 ± 1.16	-
T16217C	D-loop	no	20	1	12.53 ± 0.47	8.36 ± 1.51	-	5.77 ± 0.31	2.82 ± 0.64	-
C16223T	D-loop	no	9	12	10.81 ± 0.54	13.56 ± 0.63	0.05*	4.50 ± 0.25	6.54 ± 0.46	0.03*
A16227G	D-loop	no	20	1	11.86 ± 0.40	20.62 ± 1.31	-	5.29 ± 0.23	11.55 ± 2.16	-
T16231C	D-loop	no	20	1	12.45 ± 0.48	11.5 ± 1.08	-	5.70 ± 0.33	5.31 ± 0.39	-
T16243C	D-loop	no	20	1	12.27 ± 0.48	15.03 ± 0.67	-	5.69 ± 0.33	5.46 ± 0.33	-
T16249C	D-loop	no	20	1	12.45 ± 0.48	11.5 ± 1.08	-	5.70 ± 0.33	5.31 ± 0.39	-
C16257A	D-loop	no	20	1	12.23 ± 0.47	15.85 ± 1.29	-	5.57 ± 0.32	7.92 ± 1.06	-
C16259T	D-loop	no	20	1	12.48 ± 0.48	10.76 ± 0.21	-	5.62 ± 0.32	6.84 ± 0.66	-
C16261T	D-loop	no	19	2	12.41 ± 0.49	12.39 ± 1.66	-	5.66 ± 0.33	5.80 ± 1.06	-
C16266A	D-loop	no	18	3	12.39 ± 0.53	12.49 ± 0.63	0.84	5.79 ± 0.36	5.00 ± 0.23	0.62
G16274A	D-loop	no	20	1	12.22 ± 0.46	18.01 ± 2.12	-	5.54 ± 0.31	10.07 ± 0.41	-
C16278T	D-loop	no	19	2	11.81 ± 0.41	17.22 ± 1.76	-	5.36 ± 0.24	8.24 ± 1.95	-
C16290T	D-loop	no	19	2	12.64 ± 0.50	10.44 ± 0.71	-	5.78 ± 0.34	4.83 ± 0.46	-
C16291T	D-loop	no	20	1	12.58 ± 0.47	8.76 ± 0.38	-	5.75 ± 0.32	4.14 ± 0.27	-
A16293C	D-loop	no	20	1	11.86 ± 0.40	20.62 ± 1.31	-	5.29 ± 0.23	11.55 ± 2.16	-
T16297C	D-loop	no	19	2	12.24 ± 0.50	13.96 ± 0.56	-	5.65 ± 0.34	5.99 ± 0.48	-
T16298C	D-loop	no	18	3	12.52 ± 0.53	11.8 ± 0.68	1	5.88 ± 0.36	4.58 ± 0.27	0.42
T16304C	D-loop	no	17	4	12.98 ± 0.52	10.15 ± 0.76	0.13	5.97 ± 0.37	4.54 ± 0.42	0.33
A16309G	D-loop	no	20	1	12.35 ± 0.48	13.51 ± 0.28	-	5.69 ± 0.33	5.45 ± 0.40	-
T16311C	D-loop	no	20	1	12.51 ± 0.48	10.37 ± 1.22	-	5.71 ± 0.33	5.21 ± 0.19	-
G16319A	D-loop	no	16	5	12.87 ± 0.57	10.89 ± 0.49	0.25	6.01 ± 0.39	4.60 ± 0.27	0.14
C16327T	D-loop	no	18	3	12.53 ± 0.51	11.55 ± 0.97	1	5.73 ± 0.36	5.35 ± 0.43	0.84
T16352C	D-loop	no	20	1	12.34 ± 0.48	13.66 ± 0.36	-	5.70 ± 0.33	5.17 ± 0.03	-
C16360T	D-loop	no	20	1	12.57 ± 0.47	8.92 ± 0.40	-	5.78 ± 0.32	3.68 ± 0.13	-
T16362C	D-loop	no	15	6	11.73 ± 0.42	14.13 ± 1.17	0.39	4.94 ± 0.23	7.56 ± 0.80	0.06
A16399G	D-loop	no	20	1	12.45 ± 0.48	11.5 ± 1.08	-	5.70 ± 0.33	5.31 ± 0.39	-
A16463G	D-loop	no	20	1	12.27 ± 0.48	15.03 ± 0.67	-	5.69 ± 0.33	5.46 ± 0.33	-
G16470A	D-loop	no	20	1	12.39 ± 0.48	12.69 ± 0.61	-	5.77 ± 0.32	3.82 ± 0.40	-
G16471A	D-loop	no	20	1	12.39 ± 0.48	12.69 ± 0.61	-	5.77 ± 0.32	3.82 ± 0.40	-
G16473A	D-loop	no	20	1	12.39 ± 0.48	12.69 ± 0.61	-	5.77 ± 0.32	3.82 ± 0.40	-
A16476G	D-loop	no	20	1	12.39 ± 0.48	12.69 ± 0.61	-	5.77 ± 0.32	3.82 ± 0.40	-
T16519C	D-loop	no	11	10	13.91 ± 0.67	10.8 ± 0.49	0.08	5.71 ± 0.33	4.59 ± 0.22	0.05*
G16526A	D-loop	no	20	1	12.23 ± 0.47	15.98 ± 0.28	-	5.61 ± 0.32	7.13 ± 0.65	-
C16527T	D-loop	no	20	1	12.55 ± 0.48	10.23 ± 1.36	-	5.69 ± 0.33	5.43 ± 1.13	-
rCRS, revised Cambridge Reference Sequence
AA, Amino Acid
*P < 0.05, data are shown as mean ± SEM.
