# Supplementary material for: Generation and Bioenergetic Profiles of Cybrids with East Asian mtDNA Haplogroups
Source: Oxid Med Cell Longev. 2017 Sep 28;2017:1062314. doi: 10.1155/2017/1062314 (PMC5637837; doi:10.1155/2017/1062314)
Supplement: Supplementary file 5 [file 1062314.f5.xlsx]

## Sheet: Table S5
Table S5. Analysis of aspect ratio of confocal images in 146 SNPs
Nucleotide change	Gene	AA change	Number of subjects		AR
			rCRS base	Mutation	rCRS base	Mutation	P
T131C	D-loop	no	20	1	2.39 ± 0.025	2.61 ± 0.044	-
G143A	D-loop	no	20	1	2.41 ± 0.026	2.28 ± 0.047	-
T146C	D-loop	no	18	3	2.39 ± 0.028	2.47 ± 0.046	0.12
C150T	D-loop	no	17	4	2.41 ± 0.026	2.34 ± 0.068	0.33
T152C	D-loop	no	18	3	2.42 ± 0.028	2.33 ± 0.042	0.45
A188G	D-loop	no	20	1	2.40 ± 0.026	2.43 ± 0.032	-
A189G	D-loop	no	20	1	2.39 ± 0.025	2.61 ± 0.044	-
T199C	D-loop	no	19	2	2.41 ± 0.026	2.28 ± 0.031	-
A200G	D-loop	no	20	1	2.41 ± 0.025	2.36 ± 0.11	-
T204C	D-loop	no	20	1	2.41 ± 0.025	2.32 ± 0.044	-
G207A	D-loop	no	20	1	2.41 ± 0.025	2.32 ± 0.079	-
A210G	D-loop	no	20	1	2.41 ± 0.026	2.28 ± 0.012	-
A235G	D-loop	no	19	2	2.41 ± 0.026	2.33 ± 0.055	-
A249del	D-loop	no	16	5	2.40 ± 0.031	2.43 ± 0.030	0.36
A257G	D-loop	no	20	1	2.40 ± 0.024	2.47 ± 0.190	-
C298T	D-loop	no	20	1	2.38 ± 0.022	2.84 ± 0.049	-
T310C	D-loop	no	19	2	2.41 ± 0.027	2.37 ± 0.038	-
315C+	D-loop	no	20	1	2.40 ± 0.026	2.42 ± 0.092	-
316C+	D-loop	no	19	2	2.40 ± 0.027	2.47 ± 0.051	-
C481T	D-loop	no	20	1	2.39 ± 0.025	2.61 ± 0.044	-
T489C	D-loop	no	12	9	2.41 ± 0.027	2.39 ± 0.046	0.32
G499A	D-loop	no	20	1	2.41 ± 0.025	2.32 ± 0.079	-
A523del	D-loop	no	19	2	2.40 ± 0.027	2.42 ± 0.049	-
C524del	D-loop	no	19	2	2.40 ± 0.027	2.42 ± 0.049	-
A644G	tRNA Phe	no	20	1	2.40 ± 0.025	2.52 ± 0.080	-
A663G	12S rRNA	no	19	2	2.41 ± 0.026	2.33 ± 0.055	-
G709A	12S rRNA	no	15	6	2.40 ± 0.031	2.41 ± 0.040	0.91
C752T	12S rRNA	no	20	1	2.41 ± 0.025	2.22 ± 0.060	-
A827G	12S rRNA	no	20	1	2.41 ± 0.025	2.32 ± 0.079	-
T1005C	12S rRNA	no	19	2	2.40 ± 0.027	2.47 ± 0.048	-
T1107C	12S rRNA	no	20	1	2.41 ± 0.025	2.22 ± 0.060	-
T1420G	12S rRNA	no	20	1	2.41 ± 0.026	2.28 ± 0.012	-
A1438G	12S rRNA	no	1	20	2.22 ± 0.060	2.41 ± 0.025	-
C1508T	12S rRNA	no	20	1	2.41 ± 0.026	2.28 ± 0.012	-
G1598A	12S rRNA	no	20	1	2.39 ± 0.025	2.61 ± 0.044	-
A1736G	12S rRNA	no	19	2	2.41 ± 0.026	2.33 ± 0.055	-
T1824C	16S rRNA	no	19	2	2.40 ± 0.027	2.47 ± 0.048	-
C2280A	16S rRNA	no	20	1	2.40 ± 0.025	2.52 ± 0.080	-
A2281G	16S rRNA	no	20	1	2.40 ± 0.025	2.52 ± 0.080	-
C2772T	16S rRNA	no	20	1	2.41 ± 0.025	2.32 ± 0.079	-
C2835T	16S rRNA	no	20	1	2.40 ± 0.024	2.47 ± 0.190	-
G3010A	16S rRNA	no	18	3	2.38 ± 0.023	2.51 ± 0.099	0.55
N3107del	16S rRNA	no	20	1	2.40 ± 0.026	2.41 ± 0.059	-
G4048A	ND1	D > N	19	2	2.41 ± 0.026	2.28 ± 0.031	-
T4386C	tRNA Gln	no	20	1	2.40 ± 0.024	2.55 ± 0.181	-
A4824G	ND2	T > A	19	2	2.41 ± 0.026	2.33 ± 0.055	-
A4833G	ND2	T > A	19	2	2.41 ± 0.027	2.36 ± 0.041	-
A4935G	ND2	T > A	20	1	2.41 ± 0.026	2.30 ± 0.047	-
A5301G	ND2	I > V	20	1	2.41 ± 0.025	2.22 ± 0.060	-
G5460A	ND2	A > T	20	1	2.41 ± 0.025	2.32 ± 0.044	-
C5601T	tRNA Ala	no	20	1	2.40 ± 0.026	2.43 ± 0.032	-
G5640A	ND2	A > T	20	1	2.41 ± 0.025	2.24 ± 0.00022	-
G5821A	tRNA Cys	no	20	1	2.40 ± 0.026	2.42 ± 0.092	-
G6580A	COI	G > E	20	1	2.41 ± 0.025	2.24 ± 0.00022	-
G7853A	COII	V > I	18	3	2.41 ± 0.027	2.34 ± 0.048	0.39
8281-8289del	Non-coding 7	CCCCCTCTA	17	4	2.41 ± 0.029	2.38 ± 0.046	0.69
C8414T	ATPase8	L > F	19	2	2.39 ± 0.022	2.51 ± 0.150	-
T8576C	ATPase6	L > P	20	1	2.41 ± 0.025	2.36 ± 0.110	-
G8584A	ATPase6	A > T	17	4	2.39 ± 0.027	2.45 ± 0.058	0.4
C8684T	ATPase6	T > I	20	1	2.40 ± 0.024	2.47 ± 0.190	-
A8701G	ATPase6	T > A	12	9	2.41 ± 0.027	2.39 ± 0.046	0.32
C8794T	ATPase6	H > Y	19	2	2.41 ± 0.026	2.33 ± 0.055	-
T8843C	ATPase6	I > T	20	1	2.40 ± 0.025	2.52 ± 0.080	-
G9053A	ATPase6	S > N	19	2	2.41 ± 0.027	2.38 ± 0.040	-
G10320A	COIII	V > I	20	1	2.39 ± 0.025	2.61 ± 0.044	-
A10398G	ND3	T > A	10	11	2.41 ± 0.029	2.40 ± 0.040	0.4
C10400T	ND3	T > A	12	9	2.41 ± 0.027	2.39 ± 0.046	0.32
T10410C	tRNA Arg	no	20	1	2.41 ± 0.025	2.18 ± 0.031	-
T10609C	ND4L	M > T	19	2	2.41 ± 0.027	2.38 ± 0.040	-
G11696A	ND4	V > I	20	1	2.41 ± 0.025	2.18 ± 0.031	-
A12026G	ND4	I > V	20	1	2.41 ± 0.025	2.22 ± 0.060	-
T12083C	ND4	S > A	20	1	2.41 ± 0.026	2.35 ± 0.059	-
T12131C	ND4	S > P	20	1	2.41 ± 0.025	2.36 ± 0.11	-
A12190G	tRNA His	no	20	1	2.41 ± 0.026	2.30 ± 0.047	-
C12216T	tRNA Ser	no	20	1	2.41 ± 0.026	2.28 ± 0.012	-
T12338C	ND5	M > T	19	2	2.40 ± 0.027	2.47 ± 0.048	-
A12358G	ND5	T > A	20	1	2.40 ± 0.024	2.55 ± 0.181	-
A12361G	ND5	T > A	20	1	2.39 ± 0.025	2.61 ± 0.044	-
G12406A	ND5	V > I	19	2	2.41 ± 0.027	2.38 ± 0.040	-
T12811C	ND5	Y > H	19	2	2.41 ± 0.026	2.28 ± 0.031	-
G13708A	ND5	A > T	18	3	2.40 ± 0.028	2.43 ± 0.041	0.42
G13759A	ND5	A > T	19	2	2.41 ± 0.027	2.38 ± 0.040	-
G13928C	ND5	S > T	17	4	2.40 ± 0.030	2.43 ± 0.033	0.42
T14178C	ND6	I > V	20	1	2.40 ± 0.025	2.55 ± 0.098	-
T14318C	ND6	N > S	20	1	2.40 ± 0.026	2.42 ± 0.092	-
A14693G	tRNA Glu	no	20	1	2.40 ± 0.025	2.55 ± 0.098	-
A14769G	Cytb	N > S	20	1	2.40 ± 0.025	2.52 ± 0.080	-
A14978G	Cytb	I > V	20	1	2.40 ± 0.026	2.42 ± 0.092	-
A15662G	Cytb	I > V	20	1	2.39 ± 0.025	2.61 ± 0.044	-
A15746G	Cytb	I > V	20	1	2.41 ± 0.026	2.28 ± 0.047	-
A15851G	Cytb	I > V	20	1	2.39 ± 0.025	2.61 ± 0.044	-
G15927A	tRNA Thr	no	20	1	2.39 ± 0.025	2.61 ± 0.044	-
G15928A	tRNA Thr	no	20	1	2.40 ± 0.026	2.42 ± 0.092	-
G15930A	tRNA Thr	no	20	1	2.41 ± 0.026	2.35 ± 0.059	-
T16093C	D-loop	no	20	1	2.41 ± 0.025	2.24 ± 0.00022	-
C16111T	D-loop	no	19	2	2.39 ± 0.025	2.61 ± 0.044	-
T16124C	D-loop	no	20	1	2.41 ± 0.025	2.36 ± 0.11	-
T16126C	D-loop	no	20	1	2.40 ± 0.025	2.55 ± 0.098	-
G16129A	D-loop	no	15	6	2.41 ± 0.029	2.39 ± 0.048	1
T16136C	D-loop	no	20	1	2.41 ± 0.025	2.32 ± 0.079	-
T16140C	D-loop	no	19	2	2.40 ± 0.026	2.44 ± 0.077	-
A16162G	D-loop	no	20	1	2.40 ± 0.026	2.41 ± 0.059	-
A16164G	D-loop	no	20	1	2.41 ± 0.025	2.22 ± 0.060	-
T16172C	D-loop	no	17	4	2.43 ± 0.028	2.29 ± 0.036	0.09
A16182C	D-loop	no	17	2	2.42 ± 0.029	2.32 ± 0.031	-
A16183C	D-loop	no	16	3	2.42 ± 0.029	2.35 ± 0.041	0.96
C16184T	D-loop	no	20	1	2.40 ± 0.024	2.47 ± 0.190	-
C16188T	D-loop	no	20	1	2.41 ± 0.026	2.28 ± 0.047	-
T16189C	D-loop	no	15	6	2.42 ± 0.029	2.37 ± 0.045	0.53
C16192T	D-loop	no	20	1	2.41 ± 0.025	2.24 ± 0.00022	-
T16209C	D-loop	no	20	1	2.40 ± 0.024	2.47 ± 0.190	-
G16213A	D-loop	no	20	1	2.41 ± 0.026	2.30 ± 0.035	-
T16217C	D-loop	no	20	1	2.41 ± 0.025	2.32 ± 0.079	-
C16223T	D-loop	no	9	12	2.42 ± 0.028	2.39 ± 0.038	0.43
A16227G	D-loop	no	20	1	2.40 ± 0.026	2.43 ± 0.032	-
T16231C	D-loop	no	20	1	2.40 ± 0.025	2.55 ± 0.098	-
T16243C	D-loop	no	20	1	2.39 ± 0.025	2.61 ± 0.044	-
T16249C	D-loop	no	20	1	2.40 ± 0.025	2.55 ± 0.098	-
C16257A	D-loop	no	20	1	2.40 ± 0.024	2.55 ± 0.181	-
C16259T	D-loop	no	20	1	2.41 ± 0.025	2.22 ± 0.060	-
C16261T	D-loop	no	19	2	2.40 ± 0.025	2.43 ± 0.10	-
C16266A	D-loop	no	18	3	2.40 ± 0.028	2.41 ± 0.051	0.88
G16274A	D-loop	no	20	1	2.41 ± 0.026	2.28 ± 0.047	-
C16278T	D-loop	no	19	2	2.40 ± 0.026	2.45 ± 0.087	-
C16290T	D-loop	no	19	2	2.41 ± 0.026	2.33 ± 0.055	-
C16291T	D-loop	no	20	1	2.40 ± 0.026	2.43 ± 0.052	-
A16293C	D-loop	no	20	1	2.40 ± 0.026	2.43 ± 0.032	-
T16297C	D-loop	no	19	2	2.41 ± 0.026	2.28 ± 0.031	-
T16298C	D-loop	no	18	3	2.41 ± 0.027	2.39 ± 0.068	0.96
T16304C	D-loop	no	17	4	2.40 ± 0.030	2.43 ± 0.033	0.42
A16309G	D-loop	no	20	1	2.41 ± 0.025	2.24 ± 0.00022	-
T16311C	D-loop	no	20	1	2.40 ± 0.026	2.42 ± 0.092	-
G16319A	D-loop	no	16	5	2.41 ± 0.028	2.37 ± 0.054	0.84
C16327T	D-loop	no	18	3	2.42 ± 0.027	2.31 ± 0.051	0.29
T16352C	D-loop	no	20	1	2.40 ± 0.026	2.41 ± 0.059	-
C16360T	D-loop	no	20	1	2.41 ± 0.026	2.30 ± 0.047	-
T16362C	D-loop	no	15	6	2.41 ± 0.026	2.39 ± 0.057	0.39
A16399G	D-loop	no	20	1	2.40 ± 0.025	2.55 ± 0.098	-
A16463G	D-loop	no	20	1	2.39 ± 0.025	2.61 ± 0.044	-
G16470A	D-loop	no	20	1	2.40 ± 0.024	2.47 ± 0.190	-
G16471A	D-loop	no	20	1	2.40 ± 0.024	2.47 ± 0.190	-
G16473A	D-loop	no	20	1	2.40 ± 0.024	2.47 ± 0.190	-
A16476G	D-loop	no	20	1	2.40 ± 0.024	2.47 ± 0.190	-
T16519C	D-loop	no	11	10	2.39 ± 0.041	2.42 ± 0.026	0.32
G16526A	D-loop	no	20	1	2.38 ± 0.022	2.84 ± 0.049	-
C16527T	D-loop	no	20	1	2.40 ± 0.025	2.52 ± 0.080	-
rCRS, revised Cambridge Reference Sequence
AA, Amino Acid
AR, Aspect Ratio
*P < 0.05, data are shown as mean ± SEM.
