# Supplementary material for: Generation and Bioenergetic Profiles of Cybrids with East Asian mtDNA Haplogroups
Source: Oxid Med Cell Longev. 2017 Sep 28;2017:1062314. doi: 10.1155/2017/1062314 (PMC5637837; doi:10.1155/2017/1062314)
Supplement: Supplementary file 6 [file 1062314.f6.xlsx]

## Sheet: Table S6
Table S6. Analysis of form factor of confocal images in 146 SNPs
Nucleotide change	Gene	AA change	Number of subjects		FF
			rCRS base	Mutation	rCRS base	Mutation	P
T131C	D-loop	no	20	1	3.51 ± 0.12	4.20 ± 0.21	-
G143A	D-loop	no	20	1	3.56 ± 0.12	3.41 ± 0.28	-
T146C	D-loop	no	18	3	3.62 ± 0.13	3.13 ± 0.21	0.32
C150T	D-loop	no	17	4	3.50 ± 0.12	3.81 ± 0.36	0.53
T152C	D-loop	no	18	3	3.43 ± 0.12	4.23 ± 0.31	0.07
A188G	D-loop	no	20	1	3.59 ± 0.12	2.76 ± 0.18	-
A189G	D-loop	no	20	1	3.51 ± 0.12	4.20 ± 0.21	-
T199C	D-loop	no	19	2	3.46 ± 0.12	4.80 ± 0.32	-
A200G	D-loop	no	20	1	3.55 ± 0.12	3.51 ± 0.43	-
T204C	D-loop	no	20	1	3.49 ± 0.12	5.21 ± 0.41	-
G207A	D-loop	no	20	1	3.50 ± 0.12	4.49 ± 0.55	-
A210G	D-loop	no	20	1	3.55 ± 0.12	3.59 ± 0.15	-
A235G	D-loop	no	19	2	3.49 ± 0.12	4.09 ± 0.39	-
A249del	D-loop	no	16	5	3.67 ± 0.14	3.18 ± 0.21	0.14
A257G	D-loop	no	20	1	3.56 ± 0.12	3.33 ± 0.16	-
C298T	D-loop	no	20	1	3.61 ± 0.19	2.32 ± 0.03	-
T310C	D-loop	no	19	2	3.56 ± 0.12	3.47 ± 0.54	-
315C+	D-loop	no	20	1	3.56 ± 0.12	3.34 ± 0.42	-
316C+	D-loop	no	19	2	3.64 ± 0.12	2.76 ± 0.18	-
C481T	D-loop	no	20	1	3.51 ± 0.12	4.20 ± 0.21	-
T489C	D-loop	no	12	9	3.65 ± 0.16	3.41 ± 0.17	0.57
G499A	D-loop	no	20	1	3.50 ± 0.12	4.49 ± 0.55	-
A523del	D-loop	no	19	2	3.60 ± 0.13	3.11 ± 0.22	-
C524del	D-loop	no	19	2	3.60 ± 0.13	3.11 ± 0.22	-
A644G	tRNA Phe	no	20	1	3.60 ± 0.12	2.64 ± 0.37	-
A663G	12S rRNA	no	19	2	3.49 ± 0.12	4.09 ± 0.39	-
G709A	12S rRNA	no	15	6	3.54 ± 0.15	3.59 ± 0.16	0.68
C752T	12S rRNA	no	20	1	3.57 ± 0.12	3.19 ± 0.41	-
A827G	12S rRNA	no	20	1	3.50 ± 0.12	4.49 ± 0.55	-
T1005C	12S rRNA	no	19	2	3.65 ± 0.12	2.62 ± 0.20	-
T1107C	12S rRNA	no	20	1	3.57 ± 0.12	3.19 ± 0.41	-
T1420G	12S rRNA	no	20	1	3.55 ± 0.12	3.59 ± 0.15	-
A1438G	12S rRNA	no	1	20	3.19 ± 0.41	3.57 ± 0.12	-
C1508T	12S rRNA	no	20	1	3.55 ± 0.12	3.59 ± 0.15	-
G1598A	12S rRNA	no	20	1	3.51 ± 0.12	4.20 ± 0.21	-
A1736G	12S rRNA	no	19	2	3.49 ± 0.12	4.09 ± 0.39	-
T1824C	16S rRNA	no	19	2	3.65 ± 0.12	2.62 ± 0.20	-
C2280A	16S rRNA	no	20	1	3.60 ± 0.12	2.64 ± 0.37	-
A2281G	16S rRNA	no	20	1	3.60 ± 0.12	2.64 ± 0.37	-
C2772T	16S rRNA	no	20	1	3.50 ± 0.12	4.49 ± 0.55	-
C2835T	16S rRNA	no	20	1	3.56 ± 0.12	3.33 ± 0.16	-
G3010A	16S rRNA	no	18	3	3.67 ± 0.13	2.87 ± 0.23	0.13
N3107del	16S rRNA	no	20	1	3.59 ± 0.12	2.88 ± 0.07	-
G4048A	ND1	D > N	19	2	3.46 ± 0.12	4.80 ± 0.32	-
T4386C	tRNA Gln	no	20	1	3.57 ± 0.12	3.10 ± 0.68	-
A4824G	ND2	T > A	19	2	3.49 ± 0.12	4.09 ± 0.39	-
A4833G	ND2	T > A	19	2	3.60 ± 0.13	3.09 ± 0.21	-
A4935G	ND2	T > A	20	1	3.52 ± 0.12	4.18 ± 0.96	-
A5301G	ND2	I > V	20	1	3.57 ± 0.12	3.19 ± 0.41	-
G5460A	ND2	A > T	20	1	3.49 ± 0.12	5.21 ± 0.41	-
C5601T	tRNA Ala	no	20	1	3.59 ± 0.12	2.76 ± 0.18	-
G5640A	ND2	A > T	20	1	3.52 ± 0.12	4.40 ± 0.33	-
G5821A	tRNA Cys	no	20	1	3.56 ± 0.12	3.34 ± 0.42	-
G6580A	COI	G > E	20	1	3.52 ± 0.12	4.40 ± 0.33	-
G7853A	COII	V > I	18	3	3.47 ± 0.12	4.18 ± 0.38	0.16
8281-8289del	Non-coding 7	CCCCCTCTA	17	4	3.41 ± 0.13	4.12 ± 0.26	0.09
C8414T	ATPase8	L > F	19	2	3.61 ± 0.13	2.99 ± 0.31	-
T8576C	ATPase6	L > P	20	1	3.55 ± 0.12	3.51 ± 0.43	-
G8584A	ATPase6	A > T	17	4	3.54 ± 0.14	3.62 ± 0.15	0.86
C8684T	ATPase6	T > I	20	1	3.56 ± 0.12	3.33 ± 0.16	-
A8701G	ATPase6	T > A	12	9	3.65 ± 0.16	3.41 ± 0.17	0.57
C8794T	ATPase6	H > Y	19	2	3.49 ± 0.12	4.09 ± 0.39	-
T8843C	ATPase6	I > T	20	1	3.60 ± 0.12	2.64 ± 0.37	-
G9053A	ATPase6	S > N	19	2	3.54 ± 0.13	3.66 ± 0.35	-
G10320A	COIII	V > I	20	1	3.51 ± 0.12	4.20 ± 0.21	-
A10398G	ND3	T > A	10	11	3.60 ± 0.19	3.50 ± 0.14	0.94
C10400T	ND3	T > A	12	9	3.65 ± 0.16	3.41 ± 0.17	0.57
T10410C	tRNA Arg	no	20	1	3.54 ± 0.12	3.67 ± 0.08	-
T10609C	ND4L	M > T	19	2	3.54 ± 0.13	3.66 ± 0.35	-
G11696A	ND4	V > I	20	1	3.54 ± 0.12	3.67 ± 0.08	-
A12026G	ND4	I > V	20	1	3.57 ± 0.12	3.19 ± 0.41	-
T12083C	ND4	S > A	20	1	3.50 ± 0.12	4.45 ± 0.10	-
T12131C	ND4	S > P	20	1	3.55 ± 0.12	3.51 ± 0.43	-
A12190G	tRNA His	no	20	1	3.52 ± 0.12	4.18 ± 0.96	-
C12216T	tRNA Ser	no	20	1	3.55 ± 0.12	3.59 ± 0.15	-
T12338C	ND5	M > T	19	2	3.65 ± 0.12	2.62 ± 0.20	-
A12358G	ND5	T > A	20	1	3.57 ± 0.12	3.10 ± 0.68	-
A12361G	ND5	T > A	20	1	3.51 ± 0.12	4.20 ± 0.21	-
G12406A	ND5	V > I	19	2	3.54 ± 0.13	3.66 ± 0.35	-
T12811C	ND5	Y > H	19	2	3.46 ± 0.12	4.80 ± 0.32	-
G13708A	ND5	A > T	18	3	3.61 ± 0.13	3.23 ± 0.33	0.32
G13759A	ND5	A > T	19	2	3.54 ± 0.13	3.66 ± 0.35	-
G13928C	ND5	S > T	17	4	3.65 ± 0.13	3.14 ± 0.25	0.15
T14178C	ND6	I > V	20	1	3.56 ± 0.12	3.46 ± 0.31	-
T14318C	ND6	N > S	20	1	3.56 ± 0.12	3.34 ± 0.42	-
A14693G	tRNA Glu	no	20	1	3.56 ± 0.12	3.46 ± 0.31	-
A14769G	Cytb	N > S	20	1	3.60 ± 0.12	2.64 ± 0.37	-
A14978G	Cytb	I > V	20	1	3.56 ± 0.12	3.34 ± 0.42	-
A15662G	Cytb	I > V	20	1	3.51 ± 0.12	4.20 ± 0.21	-
A15746G	Cytb	I > V	20	1	3.56 ± 0.12	3.41 ± 0.28	-
A15851G	Cytb	I > V	20	1	3.51 ± 0.12	4.20 ± 0.21	-
G15927A	tRNA Thr	no	20	1	3.51 ± 0.12	4.20 ± 0.21	-
G15928A	tRNA Thr	no	20	1	3.56 ± 0.12	3.34 ± 0.42	-
G15930A	tRNA Thr	no	20	1	3.50 ± 0.12	4.45 ± 0.10	-
T16093C	D-loop	no	20	1	3.52 ± 0.12	4.40 ± 0.33	-
C16111T	D-loop	no	19	2	3.51 ± 0.12	4.20 ± 0.21	-
T16124C	D-loop	no	20	1	3.55 ± 0.12	3.51 ± 0.43	-
T16126C	D-loop	no	20	1	3.56 ± 0.12	3.46 ± 0.31	-
G16129A	D-loop	no	15	6	3.47 ± 0.14	3.77 ± 0.22	0.53
T16136C	D-loop	no	20	1	3.50 ± 0.12	4.49 ± 0.55	-
T16140C	D-loop	no	19	2	3.51 ± 0.13	3.89 ± 0.18	-
A16162G	D-loop	no	20	1	3.59 ± 0.12	2.88 ± 0.07	-
A16164G	D-loop	no	20	1	3.57 ± 0.12	3.19 ± 0.41	-
T16172C	D-loop	no	17	4	3.55 ± 0.14	3.55 ± 0.20	1
A16182C	D-loop	no	17	2	3.52 ± 0.13	3.67 ± 0.30	-
A16183C	D-loop	no	16	3	3.43 ± 0.13	3.93 ± 0.24	0.13
C16184T	D-loop	no	20	1	3.56 ± 0.12	3.33 ± 0.16	-
C16188T	D-loop	no	20	1	3.56 ± 0.12	3.41 ± 0.28	-
T16189C	D-loop	no	15	6	3.43 ± 0.14	3.83 ± 0.21	0.35
C16192T	D-loop	no	20	1	3.52 ± 0.12	4.40 ± 0.33	-
T16209C	D-loop	no	20	1	3.56 ± 0.12	3.33 ± 0.16	-
G16213A	D-loop	no	20	1	3.49 ± 0.18	4.68 ± 0.48	-
T16217C	D-loop	no	20	1	3.50 ± 0.12	4.49 ± 0.55	-
C16223T	D-loop	no	9	12	3.61 ± 0.18	3.50 ± 0.16	0.83
A16227G	D-loop	no	20	1	3.59 ± 0.12	2.76 ± 0.18	-
T16231C	D-loop	no	20	1	3.56 ± 0.12	3.46 ± 0.31	-
T16243C	D-loop	no	20	1	3.51 ± 0.12	4.20 ± 0.21	-
T16249C	D-loop	no	20	1	3.56 ± 0.12	3.46 ± 0.31	-
C16257A	D-loop	no	20	1	3.57 ± 0.12	3.10 ± 0.68	-
C16259T	D-loop	no	20	1	3.57 ± 0.12	3.19 ± 0.41	-
C16261T	D-loop	no	19	2	3.54 ± 0.12	3.64 ± 0.58	-
C16266A	D-loop	no	18	3	3.59 ± 0.14	3.31 ± 0.15	0.69
G16274A	D-loop	no	20	1	3.56 ± 0.12	3.41 ± 0.28	-
C16278T	D-loop	no	19	2	3.61 ± 0.13	3.05 ± 0.17	-
C16290T	D-loop	no	19	2	3.49 ± 0.12	4.09 ± 0.39	-
C16291T	D-loop	no	20	1	3.60 ± 0.12	2.61 ± 0.24	-
A16293C	D-loop	no	20	1	3.59 ± 0.12	2.76 ± 0.18	-
T16297C	D-loop	no	19	2	3.46 ± 0.12	4.80 ± 0.32	-
T16298C	D-loop	no	18	3	3.57 ± 0.14	3.42 ± 0.14	0.76
T16304C	D-loop	no	17	4	3.65 ± 0.13	3.14 ± 0.25	0.15
A16309G	D-loop	no	20	1	3.52 ± 0.12	4.40 ± 0.33	-
T16311C	D-loop	no	20	1	3.56 ± 0.12	3.34 ± 0.42	-
G16319A	D-loop	no	16	5	3.49 ± 0.15	3.73 ± 0.18	0.32
C16327T	D-loop	no	18	3	3.49 ± 0.13	3.93 ± 0.33	0.27
T16352C	D-loop	no	20	1	3.59 ± 0.12	2.88 ± 0.07	-
C16360T	D-loop	no	20	1	3.52 ± 0.12	4.18 ± 0.96	-
T16362C	D-loop	no	15	6	3.72 ± 0.15	3.14 ± 0.15	0.16
A16399G	D-loop	no	20	1	3.56 ± 0.12	3.46 ± 0.31	-
A16463G	D-loop	no	20	1	3.51 ± 0.12	4.20 ± 0.21	-
G16470A	D-loop	no	20	1	3.56 ± 0.12	3.33 ± 0.16	-
G16471A	D-loop	no	20	1	3.56 ± 0.12	3.33 ± 0.16	-
G16473A	D-loop	no	20	1	3.56 ± 0.12	3.33 ± 0.16	-
A16476G	D-loop	no	20	1	3.56 ± 0.12	3.33 ± 0.16	-
T16519C	D-loop	no	11	10	3.52 ± 0.17	3.58 ± 0.17	0.94
G16526A	D-loop	no	20	1	3.61 ± 0.19	2.32 ± 0.03	-
C16527T	D-loop	no	20	1	3.60 ± 0.12	2.64 ± 0.37	-
rCRS, revised Cambridge Reference Sequence
AA, Amino Acid
FF, Form Factor
*P < 0.05, data are shown as mean ± SEM.
